# Supplementary material for: Polar Substitutions on the Surface of a Lipase Substantially Improve Tolerance in Organic Solvents
Source: PubMed Central journal article supplement — ChemSusChem. 2022 Feb 9;15(9):e202102551. doi: 10.1002/cssc.202102551 (PMC9305861; doi:10.1002/cssc.202102551), 2022-02-09
Supplement: CSSC-15-0-s001.pdf [file CSSC-15-0-s001.pdf]

# ChemSusChem

## Supporting Information

### **Polar Substitutions on the Surface of a Lipase Substantially Improve Tolerance in Organic Solvents**

Haiyang Cui, Markus Vedder, Lingling Zhang, Karl-Erich Jaeger, Ulrich Schwaneberg,\* and Mehdi D. Davari\* This publication is part of a collection of invited contributions focusing on "Biocatalysis as Key to Sustainable Industrial Chemistry". Please visit [to view all contributions](#). © 2022 The Authors. ChemSusChem published by Wiley-VCH GmbH. This is an open access article under the terms of the Creative Commons Attribution Non-Commercial NoDerivs License, which permits use and distribution in any medium, provided the original work is properly cited, the use is non-commercial and no modifications or adaptations are made.

# Polar substitutions on the surface of a lipase substantially improve tolerance in organic solvents

*Haiyang Cui<sup>1,2†</sup>, Markus Vedder<sup>1</sup>, Lingling Zhang<sup>3</sup>, Can Bora Yildiz<sup>1</sup>, Karl-Erich Jaeger<sup>4,5</sup>,  
Ulrich Schwaneberg<sup>1,2\*</sup>, Mehdi D. Davar<sup>6,\*</sup>*

<sup>1</sup>Institute of Biotechnology, RWTH Aachen University, Worringerweg 3, Aachen 52074,  
Germany

<sup>2</sup>DWI-Leibniz Institute for Interactive Materials, Forckenbeckstraße 50, Aachen 52074,  
Germany

<sup>3</sup>Tianjin Institute of Industrial Biotechnology, Chinese Academy of Sciences, West 7th Avenue  
32, Tianjin Airport Economic Area, Tianjin 300308, China

<sup>4</sup>Institute of Molecular Enzyme Technology, Heinrich Heine University Düsseldorf, Wilhelm  
Johnen Strasse, Jülich 52426, Germany

<sup>5</sup>Institute of Bio- and Geosciences IBG 1: Biotechnology, Forschungszentrum Jülich GmbH,  
Wilhelm Johnen Strasse, Jülich 52426, Germany

<sup>6</sup>Department of Bioorganic Chemistry, Leibniz Institute of Plant Biochemistry, Weinberg 3,  
06120 Halle, Germany

†Current address: University of Illinois at Urbana-Champaign, Carl R. Woese Institute for Genomic Biology, 1206 West Gregory Drive, Urbana, IL 61801

\*Corresponding Author: Dr. Mehdi D. Davari

Prof. Dr. Ulrich Schwaneberg

## Table of Contents

|                                                                                                                                                                                          |    |
|------------------------------------------------------------------------------------------------------------------------------------------------------------------------------------------|----|
| Overall structure dynamics and solvation behaviors in BSLA substitutions.....                                                                                                            | 6  |
| Energy interaction behaviors on the substituted site.....                                                                                                                                | 7  |
| Conformational and solvation change in the substrate binding cleft.....                                                                                                                  | 8  |
| <b>Table S1.</b> Summary of calculated observables during MD simulation.....                                                                                                             | 9  |
| <b>Table S2.</b> Property of the selected fifteen non-beneficial substitutions.....                                                                                                      | 11 |
| <b>Table S3.</b> Property of the selected thirty beneficial substitutions.....                                                                                                           | 12 |
| <b>Table S4.</b> The averaged non-bond binding energy between the overall structure of BSLA variants and DMSO molecules.....                                                             | 14 |
| <b>Table S5.</b> The averaged non-bond binding energy between the overall structure of BSLA variants and Water molecules.....                                                            | 15 |
| <b>Table S6.</b> The averaged non-bond binding energy between the substituted site and DMSO molecules.....                                                                               | 16 |
| <b>Table S7.</b> The averaged non-bond binding energy between the substituted site and water molecules.....                                                                              | 17 |
| <b>Table S8.</b> Analysis of 1267 polar substitution that all type of amino acid substitute to polar residue towards OSs resistance in BSLA-SSM library.....                             | 18 |
| <b>Table S9.</b> Analysis of the 364 non-polar substitutions that polar amino acid substitute to non-polar residue towards OSs resistance in BSLA-SSM library.....                       | 19 |
| <b>Table S10.</b> Analysis of the 896 surface polar substitutions that all type of amino acid substitute to polar residue towards OSs resistance in BSLA-SSM library.....                | 20 |
| <b>Table S11.</b> Analysis of the surface polar substitutions that different amino acid substitute to polar residue towards OSs resistance in BSLA-SSM library.....                      | 21 |
| Figure S1. Root-mean-square deviation (RMSD) of the BSLA non-beneficial substitutions backbone with respect to the initial structure as a function of time in 60 % (v/v) DMSO.....       | 22 |
| Figure S2. Root-mean-square deviation (RMSD) of the BSLA beneficial substitutions (group 1) backbone with respect to the initial structure as a function of time in 60 % (v/v) DMSO..... | 23 |

|                                                                                                                                                                                          |    |
|------------------------------------------------------------------------------------------------------------------------------------------------------------------------------------------|----|
| Figure S3. Root-mean-square deviation (RMSD) of the BSLA beneficial substitutions (group 2) backbone with respect to the initial structure as a function of time in 60 % (v/v) DMSO..... | 24 |
| Figure S4. Time-average RMSD of BSLA non-beneficial and beneficial substitutions determined from the last 40 ns of simulations in 60 % (v/v) DMSO. ....                                  | 25 |
| <b>Figure S5.</b> Thermodynamic stability ( $\Delta\Delta G_{\text{fold}}$ ) of BSLA beneficial and non-beneficial substitutions .....                                                   | 26 |
| <b>Figure S6.</b> The time-averaged radius of gyration ( $R_g$ ) of BSLA non-beneficial and beneficial substitutions in 60 % (v/v) DMSO.....                                             | 27 |
| <b>Figure S7.</b> The number of internal hydrogen bonds with > 95% occupancy in BSLA beneficial and non-beneficial substitutions in 60 % (v/v) DMSO.....                                 | 28 |
| <b>Figure S8.</b> The time-averaged (a) total (b) hydrophobic (c) hydrophilic SASA of BSLA beneficial and non-beneficial substitutions in 60 % (v/v) DMSO .....                          | 29 |
| <b>Figure S9.</b> Hydration shell of BSLA beneficial and non-beneficial substitutions in 60 % (v/v) DMSO during MD simulations.....                                                      | 30 |
| <b>Figure S10.</b> DMSO solvation layer of BSLA the non-beneficial and beneficial substitution in 60 % (v/v) DMSO during MD simulations.....                                             | 31 |
| <b>Figure S11.</b> The average number of water molecules around the BSLA substituted residue during the MD simulations in 60 % (v/v) DMSO .....                                          | 32 |
| <b>Figure S12.</b> Contacts frequency of substituted sites between the BSLA beneficial substitution (group 2) and (a) water, (b) DMSO molecule in 60 % (v/v) DMSO, respectively .....    | 33 |
| Figure S13. Contacts frequency between each BSLA residue and DMSO towards non-beneficial and beneficial substitutions in 60 % (v/v) DMSO .....                                           | 34 |
| Figure S14. Contacts frequency between each BSLA residue and water towards non-beneficial and beneficial substitutions in 60 % (v/v) DMSO .....                                          | 35 |
| Figure S15. RMSF of each residue of BSLA non-beneficial substitutions determined from the last 40 ns of MD simulations in 60 % (v/v) DMSO .....                                          | 36 |
| Figure S16. RMSF of each residue of BSLA beneficial substitutions (group 1) determined from the last 40 ns of MD simulations in 60 % (v/v) DMSO.....                                     | 37 |
| Figure S17. RMSF of each residue of BSLA beneficial substitutions (group 2) determined from the last 40 ns of MD simulations in 60 % (v/v) DMSO.....                                     | 38 |
| <b>Figure S18.</b> The RMSF of the substituted residue of BSLA beneficial substitutions (group 2) in 60 % (v/v) DMSO.....                                                                | 39 |

|                                                                                                                                                                                                                              |    |
|------------------------------------------------------------------------------------------------------------------------------------------------------------------------------------------------------------------------------|----|
| <b>Figure S19.</b> The SASA of the substituted residue of BSLA beneficial and non-beneficial substitutions in 60 % (v/v) DMSO during MD simulations .....                                                                    | 40 |
| <b>Figure S20.</b> Averaged distance between substituted residue and the catalytic triad ( <b>a</b> ) Ser77, ( <b>b</b> ) Asp133, ( <b>c</b> ) His156 of BSLA beneficial and non-beneficial substitutions in 60 % (v/v) DMSO | 41 |
| <b>Figure S21.</b> Conformational and solvation change in the substrate binding cleft .....                                                                                                                                  | 42 |
| <b>Figure S22.</b> The averaged internal-atomic distance between the catalytic triad (Ser77, His156, Asp133) and oxyanion hole (Ile12, Met78) of BSLA beneficial and non-beneficial substitutions .....                      | 43 |
| <b>Figure S23.</b> The average number of solvent molecules in substrate binding cleft of BSLA beneficial and non-beneficial substitutions during the MD simulations .....                                                    | 44 |
| <b>Figure S24.</b> DOX resistance heatmap of BSLA surface polar-related substitutions .....                                                                                                                                  | 45 |
| <b>Figure S25.</b> TFE resistance heatmap of BSLA surface polar-related substitutions.....                                                                                                                                   | 46 |

## Overall structure dynamics and solvation behaviors in BSLA substitutions

As shown in Figure S1-S4, the structures of both beneficial and non-beneficial BSLA variants were maintained in DMSO throughout the time evolution. 36.7 % (11/30) beneficial polar substitutions displayed reduced RMSD value (**Figure 1b** and **S4**), indicating that the whole BSLA structure becomes more stable in DMSO comparing to non-beneficial ones. However, there are 40.0 % (12/30) and 23.3 % (7/30) of beneficial variants showing comparable and increased RMSD value, respectively. Similar results were confirmed by thermodynamic stability analysis (**Figure 1b** and **Figure S5**). The  $R_g$  was nearly 12.5 Å for all BSLA variants and only had little difference in first decimal place. The fluctuations of  $R_g$  in 47 % (14/30) variants were in the same range (beneficial = non-beneficial, **Figure 1b** and **S6**). The latter indicates little variation structural compactness within BSLA variants in DMSO. Similar observation was shown in terms of internal H-bond that 56.7 % (17/30) was equal for beneficial and non-beneficial substitutions (**Figure 1b**, and **S7**). 76.7 % had unchanged even decreased total SASA compared to non-beneficial, which mainly coming from the lower hydrophobic SASA (46.7 %) but similar hydrophilic SASA (46.7 %) in **Figure 1b** and **S8**.

### **Energy interaction behaviors on the substituted site.**

Furthermore, energy-based factors, including the non-bond binding free energies ( $\Delta G_{\text{non-bond}}$ ), electrostatic energy ( $\Delta E_{\text{elec}}$ ), and van der Waals force ( $\Delta E_{\text{vdW}}$ ), were calculated to examine the strength of water/OS molecule binds to BSLA substituted site (**Figure 3a** and **Table S6-S7**). 63 % (19/30) and 70 % (21/30) variants present inferior  $\Delta G_{\text{non-bond}}$  value of non-bond DMSO and superior  $\Delta E_{\text{elec}}$  value of residue-water, respectively, which indeed correlating to the above solvation founding. The result of interaction energies demonstrated that DMSO molecules in beneficial polar substitutions interact the enzyme more slightly than non-beneficial ones. Oppositely, water binds more tightly.



## Conformational and solvation change in the substrate binding cleft

The distance between substitution positions and catalytic triad (S77, D133, H156) were varied from 6.3 Å to 32.7 Å (**Figure S20**). The overview of conformational and solvation change in the substrate binding cleft was shown in **Figure S21**. In detail, the Asp133-OD1...His156-ND1 distance did not show a obvious change in 84 % BSLA beneficial substitutions (**Figure S21** and **S22**), suggesting that the original H-bond (around 3.5 Å) between Asp133 and His156 is very stable in BSLA.<sup>[1]</sup> As previous founding,<sup>[2]</sup> the catalytically relevant H-bond between Ser77-OG and His156-NE2 of BSLA in DMSO was mostly broken because the distance increased from ~4.5 Å in water to 4.6-12.0 Å (**Figure S21** and **S22**).<sup>[1]</sup> 43 % beneficial substitutions had an increased Ser77-OG...His156-NE2 distance. But 50 % Ile12-N...Met78-N (oxyanion hole) showed decreased distance value, which would disturb the stabilization state of negatively charged reaction intermediates and/or the substrate specificity.<sup>[1]</sup> Almost comparable solvation phenomenon are happened in the substrate binding cleft with ranging 54-77 % (**Figure S21** and **S23**).

**Table S1.** Summary of calculated observables during MD simulation.

| Descriptor                         | Location             | Observables                          | Results           |
|------------------------------------|----------------------|--------------------------------------|-------------------|
| Overall protein                    | Geometrical property | Time-averaged RMSD                   | Fig. 1b, S1-S4    |
|                                    |                      | Time-averaged $R_g$                  | Fig. 1b, S6       |
|                                    |                      | Internal H-bond                      | Fig. 1b, S7       |
|                                    |                      | Thermodynamic stability              | Fig. 1b, S5       |
|                                    |                      | Total SASA                           | Fig. 1b, S8a      |
|                                    |                      | Hydrophobic SASA                     | Fig. 1b, S8b      |
|                                    |                      | Hydrophilic SASA                     | Fig. 1b, S8c      |
|                                    | Solvation phenomenon | DMSO layer                           | Fig. 1b, S10      |
|                                    |                      | Hydration shell                      | Fig. 1b, S9       |
|                                    |                      | BSLA-DMSO contact frequency          | Fig. 1b, 1c       |
|                                    |                      | BSLA-Water contact frequency         | Fig. 1b, 1d       |
|                                    | Interaction energy   | $\Delta E_{vdW}$ (BSLA-DMSO)         | Fig. 1b, Tab. S4  |
|                                    |                      | $\Delta E_{elec}$ (BSLA-DMSO)        | Fig. 1b, Tab. S4  |
| $\Delta G_{non-bond}$ (BSLA-DMSO)  |                      | Fig. 1b, Tab. S4                     |                   |
| $\Delta E_{vdW}$ (BSLA-Water)      |                      | Fig. 1b, Tab. S5                     |                   |
| $\Delta E_{elec}$ (BSLA-Water)     |                      | Fig. 1b, Tab. S5                     |                   |
| $\Delta G_{non-bond}$ (BSLA-Water) |                      | Fig. 1b, Tab. S5                     |                   |
| Substitution site                  | Geometrical property | SASA of residue                      | Fig. 3a, S19      |
|                                    |                      | RMSF of residue                      | Fig. 3b, S15-S18, |
|                                    |                      | Distance of substitution...Ser77     | Fig. 3a, S20a     |
|                                    |                      | Distance of substitution...Asp133    | Fig. 3a, S20b     |
|                                    |                      | Distance of substitution...His156    | Fig. 3a, S20c     |
|                                    | Solvation phenomenon | Number of DMSO molecule              | Fig. 3a, 3b       |
|                                    |                      | Number of Water molecule             | Fig. 3a, S11      |
|                                    |                      | Residue-DMSO contact frequency       | Fig. 4, S12, S13  |
|                                    |                      | Residue-Water contact frequency      | Fig. 4, S12, S14  |
|                                    | Interaction energy   | $\Delta E_{vdW}$ (Residue-DMSO)      | Fig. 3a, Tab. S6  |
|                                    |                      | $\Delta E_{elec}$ (Residue-DMSO)     | Fig. 3a, Tab. S6  |
|                                    |                      | $\Delta G_{non-bond}$ (Residue-DMSO) | Fig. 3a, Tab. S6  |
|                                    |                      | $\Delta E_{vdW}$ (Residue-Water)     | Fig. 3a, Tab. S7  |

| Descriptor  | Location             | Observables                                  | Results          |
|-------------|----------------------|----------------------------------------------|------------------|
|             |                      | $\Delta E_{\text{elec}}$ (Residue-Water)     | Fig. 3a, Tab. S7 |
|             |                      | $\Delta G_{\text{non-bond}}$ (Residue-Water) | Fig. 3a, Tab. S7 |
| Active site | Geometrical property | Distance of His156-ND1...Asp133-OD1          | Fig. S21, S22c   |
|             |                      | Distance of Ser77-OG...His156-OD2            | Fig. S21, S22b   |
|             |                      | Distance of Ile12-N...Met78-N                | Fig. S21, S22a   |
|             | Solvation phenomenon | Number of DMSO molecule                      | Fig. S21, S23a   |
|             |                      | Number of Water molecule                     | Fig. S21, S23b   |
|             |                      | SBC-DMSO contact frequency <sup>[a]</sup>    | Fig. S13         |
|             |                      | SBC-Water contact frequency <sup>[a]</sup>   | Fig. S13         |
| In total    |                      | 39                                           |                  |

<sup>[a]</sup>Substrate binding cleft is donated as SBC.

**Table S2.** Property of the selected fifteen non-beneficial substitutions

| Surface Substitution <sup>[a]</sup> |       | Secondary structure <sup>[b]</sup> | Specific activity relative to WT <sup>[c]</sup> | Resistance relative to WT |
|-------------------------------------|-------|------------------------------------|-------------------------------------------------|---------------------------|
| Non-beneficial                      | N4I   | loop                               | 1.13 ± 0.12                                     | 0.7 ± 0.07                |
|                                     | I12G  | turn                               | 0.06 ± 0.01                                     | 0.0                       |
|                                     | G14F  | loop                               | 1.18 ± 0.12                                     | 0.3 ± 0.03                |
|                                     | A15W  | loop                               | 1.20 ± 0.13                                     | 0.6 ± 0.06                |
|                                     | F17W  | 3/10-helix                         | 1.55 ± 0.16                                     | 1.0 ± 0.10                |
|                                     | G93Y  | 3/10-helix                         | 1.37 ± 0.14                                     | 1.0 ± 0.10                |
|                                     | N94W  | 3/10-helix                         | 0.80 ± 0.08                                     | 0.8 ± 0.08                |
|                                     | K95I  | loop                               | 1.01 ± 0.11                                     | 1.1 ± 0.12                |
|                                     | M137F | loop                               | 0.89 ± 0.09                                     | 0.9 ± 0.09                |
|                                     | L140Y | α-helix                            | 1.76 ± 0.18                                     | 0.9 ± 0.09                |
|                                     | G145V | loop                               | 0.22 ± 0.02                                     | 0.9 ± 0.09                |
|                                     | Q150W | Beta strand                        | 1.45 ± 0.15                                     | 0.9 ± 0.09                |
|                                     | L168I | α-helix                            | 0.22 ± 0.02                                     | 0.7 ± 0.07                |
|                                     | G175W | turn                               | 0.90 ± 0.09                                     | 0.9 ± 0.09                |
|                                     | G177I | loop                               | 0.87 ± 0.09                                     | 0.9 ± 0.09                |

<sup>[a]</sup>Relative location assignment to the sequence based on the structure of BSLA WT (PDB ID: 1i6w<sup>[3]</sup>, chain A) was taken from previous work.<sup>[4]</sup>

<sup>[b]</sup> Secondary structure data provided by DSSP.<sup>[5]</sup>

<sup>[c]</sup> The specific activity of the purified BSLA WT in the absence/presence of 60 % (v/v) DMSO was 11.5 ± 1.2 U/mg and 4.6 ± 0.9 U/mg, respectively. One unit (U) of enzyme activity was defined as the amount of enzyme releasing 1.0 mmol of *p*-nitrophenol per minute under the assay conditions.<sup>[6]</sup>

**Table S3.** Property of the selected thirty beneficial substitutions

| Surface Substitution <sup>[a]</sup> |       | Secondary structure <sup>[b]</sup> | Specific activity relative to WT <sup>[c]</sup> | Resistance relative to WT |
|-------------------------------------|-------|------------------------------------|-------------------------------------------------|---------------------------|
| Beneficial substitutions group 1    | N4S   | loop                               | 2.11 ± 0.22                                     | 1.8 ± 0.19                |
|                                     | I12S  | turn                               | 0.22 ± 0.02                                     | 2.6 ± 0.27                |
|                                     | G14N  | loop                               | 0.24 ± 0.03                                     | 1.5 ± 0.16                |
|                                     | A15T  | loop                               | 0.65 ± 0.07                                     | 1.4 ± 0.15                |
|                                     | F17M  | 3/10-helix                         | 1.23 ± 0.13                                     | 1.6 ± 0.17                |
|                                     | G93M  | 3/10-helix                         | 0.83 ± 0.09                                     | 1.3 ± 0.14                |
|                                     | N94M  | 3/10-helix                         | 1.27 ± 0.13                                     | 1.3 ± 0.14                |
|                                     | K95S  | loop                               | 1.62 ± 0.17                                     | 1.7 ± 0.18                |
|                                     | M137P | loop                               | 1.87 ± 0.19                                     | 1.5 ± 0.16                |
|                                     | L140S | α-helix                            | 0.74 ± 0.08                                     | 1.6 ± 0.17                |
|                                     | G145M | loop                               | 0.68 ± 0.07                                     | 1.5 ± 0.16                |
|                                     | Q150T | Beta strand                        | 1.43 ± 0.15                                     | 1.4 ± 0.15                |
|                                     | L168T | α-helix                            | 1.30 ± 0.14                                     | 1.4 ± 0.15                |
|                                     | G175S | turn                               | 0.93 ± 0.09                                     | 1.4 ± 0.15                |
|                                     | G177T | loop                               | 0.60 ± 0.06                                     | 1.4 ± 0.15                |
| Beneficial substitutions group 2    | N4T   | loop                               | 1.88 ± 0.19                                     | 1.7 ± 0.18                |
|                                     | I12T  | turn                               | 0.22 ± 0.02                                     | 2.3 ± 0.24                |
|                                     | G14Q  | loop                               | 0.15 ± 0.02                                     | 1.4 ± 0.15                |
|                                     | A15T  | loop                               | 0.65 ± 0.07                                     | 1.4 ± 0.15                |
|                                     | F17T  | 3/10-helix                         | 1.31 ± 0.14                                     | 1.4 ± 0.15                |
|                                     | G93P  | 3/10-helix                         | 2.44 ± 0.26                                     | 1.9 ± 0.19                |
|                                     | N94P  | 3/10-helix                         | 1.34 ± 0.14                                     | 1.3 ± 0.14                |
|                                     | K95N  | loop                               | 1.59 ± 0.17                                     | 1.8 ± 0.19                |
|                                     | M137T | loop                               | 0.86 ± 0.09                                     | 1.3 ± 0.14                |
|                                     | L140T | α-helix                            | 0.87 ± 0.09                                     | 1.6 ± 0.17                |
|                                     | G145Q | loop                               | 1.47 ± 0.15                                     | 2.0 ± 0.21                |
|                                     | Q150N | Beta strand                        | 1.44 ± 0.15                                     | 1.6 ± 0.17                |
|                                     | L168N | α-helix                            | 1.44 ± 0.15                                     | 1.5 ± 0.16                |
|                                     | G175T | turn                               | 0.98 ± 0.10                                     | 1.4 ± 0.15                |
|                                     | G177Q | loop                               | 1.3 ± 0.14                                      | 1.5 ± 0.16                |

<sup>[a]</sup>Relative location assignment to the sequence based on the structure of BSLA WT (PDB ID: 1i6w<sup>[3]</sup>, chain A) was taken from previous work.<sup>[4]</sup>

<sup>[b]</sup>Secondary structure data provided by DSSP.<sup>[5]</sup>

<sup>[c]</sup> The specific activity of the purified BSLA WT in the absence/presence of 60 % (v/v) DMSO was  $11.5 \pm 1.2$  U/mg and  $4.6 \pm 0.9$  U/mg, respectively. One unit (U) of enzyme activity was defined as the amount of enzyme releasing 1.0 mmol of *p*-nitrophenol per minute under the assay conditions.<sup>[6]</sup>

**Table S4.** The averaged non-bond binding energy between the overall structure of BSLA variants and DMSO molecules.<sup>[a]</sup>

| Amino acid<br>Position | Non-beneficial (kcal/mol) |                          |                              | Beneficial group 1 (kcal/mol) |                          |                              | Beneficial group 2 (kcal/mol) |                          |                              |
|------------------------|---------------------------|--------------------------|------------------------------|-------------------------------|--------------------------|------------------------------|-------------------------------|--------------------------|------------------------------|
|                        | $\Delta E_{\text{vdW}}$   | $\Delta E_{\text{elec}}$ | $\Delta G_{\text{non-bond}}$ | $\Delta E_{\text{vdW}}$       | $\Delta E_{\text{elec}}$ | $\Delta G_{\text{non-bond}}$ | $\Delta E_{\text{vdW}}$       | $\Delta E_{\text{elec}}$ | $\Delta G_{\text{non-bond}}$ |
| 4                      | -2601 ± 131               | -2173 ± 140              | -4774 ± 270                  | -2413 ± 70                    | -1991 ± 29               | -4404 ± 84                   | -2284 ± 119                   | -1897 ± 80               | -4181 ± 169                  |
| 12                     | -2470 ± 32                | -2009 ± 46               | -4479 ± 73                   | -2294 ± 58                    | -1871 ± 63               | -4166 ± 113                  | -2371 ± 135                   | -2056 ± 170              | -4427 ± 300                  |
| 14                     | -2390 ± 95                | -1907 ± 135              | -4298 ± 214                  | -2468 ± 80                    | -2031 ± 121              | -4499 ± 197                  | -2326 ± 56                    | -1825 ± 108              | -4151 ± 167                  |
| 15                     | -2589 ± 63                | -2108 ± 92               | -4697 ± 180                  | -2384 ± 93                    | -1904 ± 148              | -4288 ± 231                  | -2405 ± 50                    | -1995 ± 23               | -4400 ± 36                   |
| 17                     | -2475 ± 102               | -2000 ± 102              | -4474 ± 201                  | -2274 ± 132                   | -1899 ± 138              | -4173 ± 300                  | -2245 ± 45                    | -1806 ± 58               | -4051 ± 113                  |
| 93                     | -2475 ± 102               | -2017 ± 111              | -4492 ± 192                  | -2445 ± 42                    | -1978 ± 28               | -4423 ± 53                   | -2519 ± 116                   | -2063 ± 30               | -4582 ± 124                  |
| 94                     | -2361 ± 119               | -1907 ± 117              | -4267 ± 202                  | -2379 ± 97                    | -1933 ± 110              | -4312 ± 194                  | -2446 ± 139                   | -2020 ± 165              | -4467 ± 286                  |
| 95                     | -2502 ± 141               | -2058 ± 151              | -4560 ± 251                  | -2301 ± 104                   | -1840 ± 95               | -4141 ± 167                  | -2402 ± 74                    | -1963 ± 36               | -4365 ± 121                  |
| 137                    | -2302 ± 112               | -1882 ± 146              | -4184 ± 140                  | -2321 ± 94                    | -1881 ± 122              | -4202 ± 207                  | -2437 ± 108                   | -2055 ± 97               | -4492 ± 190                  |
| 140                    | -2449 ± 180               | -2004 ± 173              | -4453 ± 342                  | -2357 ± 141                   | -1995 ± 204              | -4352 ± 352                  | -2435 ± 111                   | -2035 ± 72               | -4470 ± 194                  |
| 145                    | -2319 ± 126               | -1842 ± 107              | -4160 ± 94                   | -2444 ± 24                    | -2025 ± 17               | -4469 ± 55                   | -2323 ± 220                   | -1903 ± 244              | -4226 ± 457                  |
| 150                    | -2336 ± 58                | -1880 ± 69               | -4215 ± 102                  | -2368 ± 54                    | -1977 ± 28               | -4345 ± 19                   | -2512 ± 117                   | -2083 ± 120              | -4594 ± 246                  |
| 168                    | -2555 ± 36                | -2094 ± 11               | -4649 ± 120                  | -2261 ± 81                    | -1788 ± 29               | -4049 ± 96                   | -2257 ± 54                    | -1870 ± 60               | -4127 ± 99                   |
| 175                    | -2383 ± 41                | -1930 ± 34               | -4313 ± 88                   | -2402 ± 129                   | -1952 ± 128              | -4355 ± 262                  | -2622 ± 60                    | -2203 ± 89               | -4825 ± 116                  |
| 177                    | -2413 ± 141               | -1944 ± 132              | -4356 ± 265                  | -2504 ± 46                    | -2094 ± 38               | -4598 ± 131                  | -2259 ± 64                    | -1816 ± 78               | -4075 ± 108                  |

<sup>[a]</sup> The data were averaged from the last 40 ns in three independent MD runs.  $\Delta E_{\text{elec}}$ : electrostatic energy.  $\Delta E_{\text{vdW}}$ : van der Waals.  $\Delta G_{\text{non-bond}}$ : the non-bond binding.  $\Delta G_{\text{non-bond}} = \Delta E_{\text{elec}} + \Delta E_{\text{vdW}}$ .

**Table S5.** The averaged non-bond binding energy between the overall structure of BSLA variants and Water molecules.<sup>[a]</sup>

| Amino acid<br>Position | Non-beneficial (kcal/mol) |                          |                              | Beneficial group 1 (kcal/mol) |                          |                              | Beneficial group 2 (kcal/mol) |                          |                              |
|------------------------|---------------------------|--------------------------|------------------------------|-------------------------------|--------------------------|------------------------------|-------------------------------|--------------------------|------------------------------|
|                        | $\Delta E_{\text{vdW}}$   | $\Delta E_{\text{elec}}$ | $\Delta G_{\text{non-bond}}$ | $\Delta E_{\text{vdW}}$       | $\Delta E_{\text{elec}}$ | $\Delta G_{\text{non-bond}}$ | $\Delta E_{\text{vdW}}$       | $\Delta E_{\text{elec}}$ | $\Delta G_{\text{non-bond}}$ |
| 4                      | 306 ± 16                  | -7031 ± 279              | -6726 ± 272                  | 316 ± 23                      | -7250 ± 289              | -6934 ± 249                  | 308 ± 24                      | -7139 ± 360              | -6832 ± 381                  |
| 12                     | 320 ± 9                   | -7220 ± 107              | -6901 ± 136                  | 329 ± 14                      | -7339 ± 150              | -7010 ± 145                  | 314 ± 23                      | -7238 ± 95               | -6924 ± 41                   |
| 14                     | 322 ± 6                   | -7123 ± 279              | -6802 ± 216                  | 333 ± 11                      | -7297 ± 221              | -6964 ± 241                  | 315 ± 19                      | -7179 ± 93               | -6864 ± 62                   |
| 15                     | 316 ± 21                  | -7251 ± 204              | -6934 ± 198                  | 328 ± 20                      | -7331 ± 121              | -7003 ± 98                   | 317 ± 33                      | -7178 ± 323              | -6861 ± 282                  |
| 17                     | 339 ± 22                  | -7208 ± 50               | -6869 ± 123                  | 310 ± 11                      | -7204 ± 138              | -6894 ± 136                  | 330 ± 7                       | -7132 ± 133              | -6802 ± 218                  |
| 93                     | 321 ± 13                  | -7069 ± 277              | -6748 ± 230                  | 334 ± 19                      | -7335 ± 123              | -7001 ± 140                  | 312 ± 15                      | -7245 ± 62               | -6933 ± 88                   |
| 94                     | 322 ± 27                  | -7076 ± 122              | -6755 ± 79                   | 295 ± 15                      | -6860 ± 235              | -6565 ± 232                  | 304 ± 10                      | -7123 ± 242              | -6819 ± 246                  |
| 95                     | 307 ± 43                  | -6952 ± 148              | -6645 ± 119                  | 337 ± 2                       | -7298 ± 62               | -6961 ± 84                   | 318 ± 10                      | -7182 ± 192              | -6864 ± 183                  |
| 137                    | 304 ± 5                   | -7394 ± 22               | -7090 ± 225                  | 284 ± 7                       | -7022 ± 179              | -6738 ± 173                  | 314 ± 23                      | -7173 ± 272              | -6859 ± 322                  |
| 140                    | 316 ± 19                  | -7046 ± 98               | -6730 ± 105                  | 316 ± 12                      | -7274 ± 181              | -6958 ± 229                  | 318 ± 12                      | -7234 ± 253              | -6916 ± 258                  |
| 145                    | 304 ± 32                  | -7033 ± 177              | -6729 ± 134                  | 284 ± 41                      | -6884 ± 168              | -6599 ± 146                  | 322 ± 29                      | -7204 ± 129              | -6882 ± 135                  |
| 150                    | 280 ± 32                  | -7069 ± 73               | -6789 ± 82                   | 335 ± 24                      | -7141 ± 191              | -6805 ± 199                  | 303 ± 15                      | -7046 ± 269              | -6743 ± 220                  |
| 168                    | 342 ± 23                  | -7123 ± 246              | -6782 ± 115                  | 301 ± 9                       | -7387 ± 211              | -7086 ± 220                  | 309 ± 23                      | -6990 ± 220              | -6682 ± 229                  |
| 175                    | 326 ± 14                  | -7154 ± 160              | -6828 ± 146                  | 315 ± 13                      | -6974 ± 51               | -6659 ± 48                   | 327 ± 9                       | -7161 ± 101              | -6834 ± 106                  |
| 177                    | 278 ± 23                  | -7076 ± 197              | -6798 ± 160                  | 341 ± 22                      | -7361 ± 79               | -7020 ± 19                   | 301 ± 18                      | -7126 ± 145              | -6825 ± 146                  |

<sup>[a]</sup> The data were averaged from the last 40 ns in three independent MD runs.  $\Delta E_{\text{elec}}$ : electrostatic energy.  $\Delta E_{\text{vdW}}$ : van der Waals.  $\Delta G_{\text{non-bond}}$ : the non-bond binding.  $\Delta G_{\text{non-bond}} = \Delta E_{\text{elec}} + \Delta E_{\text{vdW}}$ .



**Table S6.** The averaged non-bond binding energy between the substituted site and DMSO molecules.<sup>[a]</sup>

| Amino acid<br>Position | Non-beneficial (kcal/mol) |                          |                              | Beneficial group 1 (kcal/mol) |                          |                              | Beneficial group 2 (kcal/mol) |                          |                              |
|------------------------|---------------------------|--------------------------|------------------------------|-------------------------------|--------------------------|------------------------------|-------------------------------|--------------------------|------------------------------|
|                        | $\Delta E_{\text{vdW}}$   | $\Delta E_{\text{elec}}$ | $\Delta G_{\text{non-bond}}$ | $\Delta E_{\text{vdW}}$       | $\Delta E_{\text{elec}}$ | $\Delta G_{\text{non-bond}}$ | $\Delta E_{\text{vdW}}$       | $\Delta E_{\text{elec}}$ | $\Delta G_{\text{non-bond}}$ |
| 4                      | -14 ± 1                   | -10 ± 1                  | -24 ± 1                      | -7 ± 1                        | -6 ± 4                   | -13 ± 1                      | -10 ± 1                       | -6 ± 1                   | -16 ± 1                      |
| 12                     | -12 ± 3                   | -7 ± 4                   | -18 ± 2                      | -19 ± 3                       | -17 ± 12                 | -36 ± 13                     | -24 ± 2                       | -17 ± 7                  | -42 ± 5                      |
| 14                     | -25 ± 12                  | -7 ± 6                   | -32 ± 16                     | -18 ± 5                       | -24 ± 15                 | -42 ± 10                     | -21 ± 10                      | -24 ± 14                 | -45 ± 11                     |
| 15                     | -51 ± 6                   | -22 ± 7                  | -73 ± 10                     | -19 ± 4                       | -27 ± 15                 | -46 ± 10                     | -14 ± 3                       | -14 ± 3                  | -28 ± 5                      |
| 17                     | -61 ± 4                   | -34 ± 7                  | -95 ± 8                      | -37 ± 4                       | -15 ± 7                  | -52 ± 7                      | -20 ± 3                       | -14 ± 5                  | -35 ± 5                      |
| 93                     | -31 ± 6                   | -29 ± 3                  | -60 ± 8                      | -23 ± 4                       | -14 ± 2                  | -37 ± 6                      | -14 ± 2                       | -4 ± 0                   | -18 ± 2                      |
| 94                     | -38 ± 8                   | -22 ± 4                  | -60 ± 9                      | -29 ± 2                       | -24 ± 3                  | -52 ± 3                      | -21 ± 2                       | -5 ± 2                   | -26 ± 3                      |
| 95                     | -13 ± 3                   | 0 ± 1                    | -13 ± 3                      | -7 ± 1                        | -10 ± 3                  | -17 ± 3                      | -5 ± 1                        | 0 ± 1                    | -5 ± 0                       |
| 137                    | -50 ± 1                   | -28 ± 6                  | -78 ± 28                     | -27 ± 1                       | -4 ± 1                   | -32 ± 2                      | -18 ± 2                       | -38 ± 3                  | -56 ± 2                      |
| 140                    | -26 ± 2                   | -30 ± 2                  | -56 ± 1                      | -5 ± 3                        | -24 ± 4                  | -29 ± 6                      | -11 ± 1                       | -18 ± 7                  | -29 ± 4                      |
| 145                    | -14 ± 4                   | -3 ± 2                   | -17 ± 2                      | -19 ± 8                       | -9 ± 7                   | -28 ± 9                      | -21 ± 4                       | -23 ± 4                  | -44 ± 8                      |
| 150                    | -38 ± 3                   | -20 ± 3                  | -58 ± 6                      | -15 ± 3                       | -29 ± 7                  | -44 ± 9                      | -13 ± 1                       | -22 ± 5                  | -35 ± 4                      |
| 168                    | -10 ± 2                   | -1 ± 1                   | -11 ± 5                      | -9 ± 1                        | -24 ± 3                  | -33 ± 3                      | -9 ± 0                        | -4 ± 2                   | -13 ± 3                      |
| 175                    | -51 ± 9                   | -30 ± 8                  | -81 ± 15                     | -18 ± 1                       | -17 ± 3                  | -35 ± 1                      | -25 ± 4                       | -23 ± 11                 | -47 ± 6                      |
| 177                    | -29 ± 6                   | -10 ± 6                  | -39 ± 6                      | -30 ± 7                       | -28 ± 12                 | -58 ± 9                      | -10 ± 2                       | -13 ± 15                 | -23 ± 10                     |

<sup>[a]</sup> The data were averaged from the last 40 ns in three independent MD runs.  $\Delta E_{\text{elec}}$ : electrostatic energy.  $\Delta E_{\text{vdW}}$ : van der Waals.  $\Delta G_{\text{non-bond}}$ : the non-bond binding.  $\Delta G_{\text{non-bond}} = \Delta E_{\text{elec}} + \Delta E_{\text{vdW}}$ .

**Table S7.** The averaged non-bond binding energy between the substituted site and water molecules.<sup>[a]</sup>

| Amino acid<br>Position | Non-beneficial (kcal/mol) |                          |                              | Beneficial group 1 (kcal/mol) |                          |                              | Beneficial group 2 (kcal/mol) |                          |                              |
|------------------------|---------------------------|--------------------------|------------------------------|-------------------------------|--------------------------|------------------------------|-------------------------------|--------------------------|------------------------------|
|                        | $\Delta E_{\text{vdW}}$   | $\Delta E_{\text{elec}}$ | $\Delta G_{\text{non-bond}}$ | $\Delta E_{\text{vdW}}$       | $\Delta E_{\text{elec}}$ | $\Delta G_{\text{non-bond}}$ | $\Delta E_{\text{vdW}}$       | $\Delta E_{\text{elec}}$ | $\Delta G_{\text{non-bond}}$ |
| 4                      | -8 ± 2                    | -12 ± 5                  | -19 ± 1                      | 2 ± 1                         | -29 ± 3                  | -27 ± 2                      | 0 ± 2                         | -20 ± 12                 | -20 ± 10                     |
| 12                     | -0 ± 2                    | -13 ± 10                 | -12 ± 2                      | 2 ± 2                         | -32 ± 15                 | -30 ± 6                      | 2 ± 1                         | -26 ± 7                  | -24 ± 7                      |
| 14                     | -2 ± 1                    | -3 ± 1                   | -5 ± 1                       | 4 ± 3                         | -40 ± 21                 | -37 ± 12                     | 3 ± 2                         | -51 ± 29                 | -47 ± 21                     |
| 15                     | -9 ± 3                    | -25 ± 4                  | -34 ± 7                      | 3 ± 1                         | -36 ± 11                 | -33 ± 8                      | 0 ± 2                         | -21 ± 5                  | -22 ± 5                      |
| 17                     | -7 ± 1                    | -26 ± 11                 | -33 ± 6                      | -10 ± 2                       | -16 ± 7                  | -26 ± 2                      | 0 ± 1                         | -39 ± 9                  | -39 ± 4                      |
| 93                     | 2 ± 2                     | -49 ± 7                  | -47 ± 6                      | 0 ± 2                         | -23 ± 11                 | -24 ± 7                      | -1 ± 0                        | -5 ± 6                   | -7 ± 3                       |
| 94                     | -9 ± 1                    | -20 ± 8                  | -30 ± 8                      | -7 ± 2                        | -7 ± 2                   | -14 ± 2                      | -7 ± 2                        | -3 ± 6                   | -10 ± 2                      |
| 95                     | -3 ± 1                    | -0 ± 0                   | -3 ± 0                       | 1 ± 0                         | -25 ± 3                  | -24 ± 7                      | 0 ± 2                         | -11 ± 12                 | -11 ± 2                      |
| 137                    | -8 ± 0                    | -4 ± 1                   | -12 ± 4                      | -4 ± 1                        | -1 ± 1                   | -4 ± 2                       | -2 ± 1                        | -15 ± 3                  | -17 ± 1                      |
| 140                    | 3 ± 1                     | -44 ± 4                  | -41 ± 2                      | 3 ± 1                         | -25 ± 2                  | -22 ± 5                      | 2 ± 2                         | -23 ± 11                 | -21 ± 9                      |
| 145                    | -8 ± 1                    | -9 ± 9                   | -16 ± 1                      | -10 ± 3                       | -20 ± 11                 | -29 ± 7                      | 1 ± 2                         | -71 ± 15                 | -70 ± 13                     |
| 150                    | -10 ± 1                   | -37 ± 5                  | -47 ± 6                      | 3 ± 2                         | -59 ± 11                 | -56 ± 7                      | 3 ± 2                         | -49 ± 4                  | -46 ± 2                      |
| 168                    | -5 ± 1                    | -3 ± 1                   | -8 ± 4                       | 3 ± 1                         | -46 ± 4                  | -43 ± 3                      | -1 ± 1                        | -8 ± 6                   | -10 ± 3                      |
| 175                    | -8 ± 3                    | -32 ± 8                  | -40 ± 5                      | 2 ± 2                         | -45 ± 6                  | -42 ± 3                      | -2 ± 3                        | -37 ± 7                  | -39 ± 1                      |
| 177                    | -3 ± 3                    | -18 ± 6                  | -21 ± 3                      | 1 ± 2                         | -42 ± 18                 | -40 ± 8                      | 0 ± 2                         | -30 ± 13                 | -29 ± 14                     |

<sup>[a]</sup> The data were averaged from the last 40 ns in three independent MD runs.  $\Delta E_{\text{elec}}$ : electrostatic energy.  $\Delta E_{\text{vdW}}$ : van der Waals.  $\Delta G_{\text{non-bond}}$ : the non-bond binding.  $\Delta G_{\text{non-bond}} = \Delta E_{\text{elec}} + \Delta E_{\text{vdW}}$ .

**Table S8.** Analysis of 1267 polar substitution that all type of amino acid substitute to polar residue towards OSs resistance in BSLA-SSM library.<sup>[a]</sup>

| The fraction of substitutions % (variants) |      | Beneficial          | Unchanged           | Decreased           | Inactive            |
|--------------------------------------------|------|---------------------|---------------------|---------------------|---------------------|
| All to polar                               | DMSO | 12.2%<br>(154/1267) | 57.9%<br>(734/1267) | 14.8%<br>(187/1267) | 15.2%<br>(192/1267) |
|                                            | DOX  | 3.7%<br>(47/1267)   | 65.2%<br>(873/1267) | 12.8%<br>(162/1267) | 18.3%<br>(232/1267) |
|                                            | TFE  | 6.6%<br>(84/1267)   | 59.8%<br>(842/1267) | 12.0%<br>(425/1267) | 21.5%<br>(273/1267) |

<sup>[a]</sup> 22% (v/v) DOX, 60% (v/v) DMSO, and 12% (v/v) TFE were used. Amino acid is classified as follows: Aromatic: F, Y, W; Aliphatic: A, V, L, I, G; Polar: C, M, P, S, T, N, Q; Charged: D, E, K, H, R.

**Table S9.** Analysis of the 364 non-polar substitutions that polar amino acid substitute to non-polar residue towards OSs resistance in BSLA-SSM library.<sup>[a]</sup>

| The fraction of substitutions % (variants) |      | Beneficial        | Unchanged          | Decreased         | Inactive          |
|--------------------------------------------|------|-------------------|--------------------|-------------------|-------------------|
| polar to non-polar                         | DMSO | 9.1%<br>(33/364)  | 72.3%<br>(296/364) | 11.5%<br>(68/364) | 7.1%<br>(26/364)  |
|                                            | DOX  | 6.3%<br>(23/364)  | 79.1%<br>(311/364) | 6.0%<br>(53/364)  | 8.5%<br>(31/364)  |
|                                            | TFE  | 11.3%<br>(41/364) | 69.2%<br>(293/364) | 8.5%<br>(71/364)  | 11.0%<br>(40/364) |

<sup>[a]</sup> 22% (v/v) DOX, 60% (v/v) DMSO, and 12% (v/v) TFE were used. Amino acid is classified as follows: Aromatic: F, Y, W; Aliphatic: A, V, L, I, G; Polar: C, M, P, S, T, N, Q; Charged: D, E, K, H, R.

**Table S10.** Analysis of the 896 surface polar substitutions that all type of amino acid substitute to polar residue towards OSs resistance in BSLA-SSM library.<sup>[a]</sup>

| The fraction of substitutions % (variants) |      | Beneficial         | Unchanged          | Decreased          | Inactive           |
|--------------------------------------------|------|--------------------|--------------------|--------------------|--------------------|
| Surface residue to polar                   | DMSO | 11.4%<br>(102/896) | 66.2%<br>(593/896) | 12.8%<br>(115/896) | 9.6%<br>(86/896)   |
|                                            | DOX  | 4.0%<br>(36/896)   | 75.1%<br>(695/896) | 9.9%<br>(89/896)   | 10.9%<br>(98/896)  |
|                                            | TFE  | 7.5%<br>(67/896)   | 69.3%<br>(621/896) | 8.7%<br>(78/896)   | 14.5%<br>(130/896) |

<sup>[a]</sup> 22% (v/v) DOX, 60% (v/v) DMSO, and 12% (v/v) TFE were used. Amino acid is classified as follows: Aromatic: F, Y, W, A; Aliphatic: A, V, L, I, G; Polar: C, M, P, S, T, N, Q; Charged: D, E, K, H, R.

**Table S11.** Analysis of the surface polar substitutions that different amino acid substitute to polar residue towards OSs resistance in BSLA-SSM library.<sup>[a]</sup>

| The fraction of substitutions % (variants) |      | Beneficial     | Unchanged       | Decreased      | Inactive       |
|--------------------------------------------|------|----------------|-----------------|----------------|----------------|
| Polar to polar                             | DMSO | 11.1% (33/301) | 74.4% (224/301) | 7.3% (22/301)  | 7.3% (22/301)  |
|                                            | DOX  | 4.0% (12/301)  | 83.1% (250/301) | 4.3% (13/301)  | 8.6% (26/301)  |
|                                            | TFE  | 4.0% (12/301)  | 80.4% (242/301) | 3.0% (9/301)   | 12.6% (38/301) |
| Aromatic to polar                          | DMSO | 14.3% (12/84)  | 66.7% (56/84)   | 7.1% (6/84)    | 11.9% (10/84)  |
|                                            | DOX  | 4.8% (4/84)    | 75.0% (63/84)   | 8.3% (7/84)    | 11.9% (10/84)  |
|                                            | TFE  | 4.8% (4/84)    | 77.4% (65/84)   | 4.6% (3/84)    | 14.3% (12/84)  |
| Aliphatic to polar                         | DMSO | 14.0% (43/308) | 60.4% (186/308) | 17.2% (53/308) | 8.4% (26/308)  |
|                                            | DOX  | 2.9% (9/308)   | 72.1% (222/308) | 14.0% (43/308) | 11.0% (34/308) |
|                                            | TFE  | 4.9% (15/308)  | 69.5% (214/308) | 7.1% (22/308)  | 18.5% (57/308) |
| Charged to polar                           | DMSO | 6.9% (14/203)  | 62.6% (127/203) | 16.7% (34/203) | 13.8% (28/203) |
|                                            | DOX  | 2.0% (4/203)   | 78.8% (160/203) | 4.9% (10/203)  | 14.3% (29/203) |
|                                            | TFE  | 7.4% (15/203)  | 74.4% (151/203) | 2.0% (4/203)   | 16.3% (33/203) |

<sup>[a]</sup> 22% (v/v) DOX, 60% (v/v) DMSO, and 12% (v/v) TFE were used. Amino acid is classified as follows: Aromatic: F, Y, W; Aliphatic: A, V, L, I, G; Polar: C, M, P, S, T, N, Q; Charged: D, E, K, H, R.

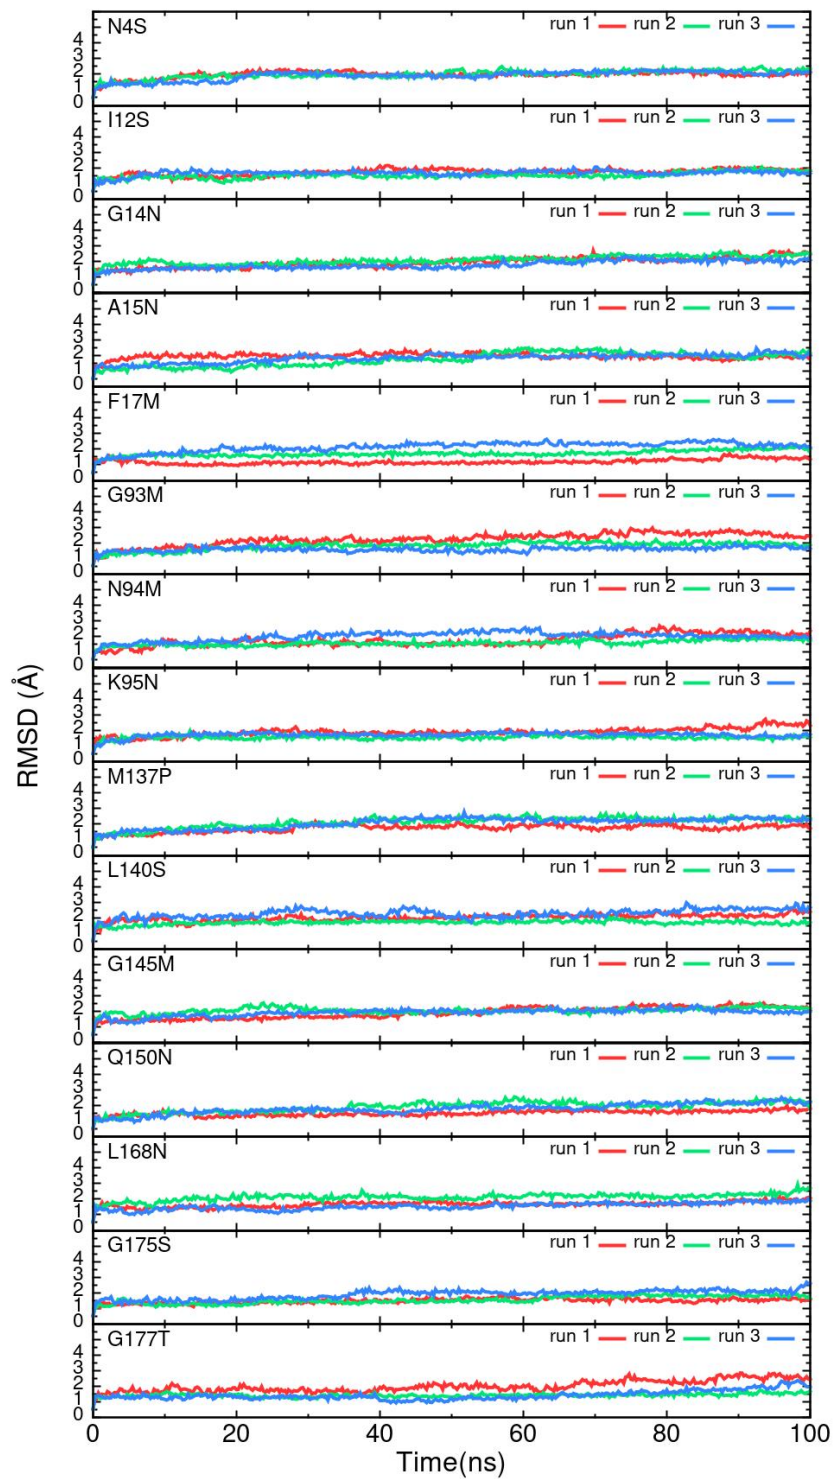

**Figure S1.** Root-mean-square deviation (RMSD) of the BSLA non-beneficial substitutions backbone with respect to the initial structure as a function of time in 60 % (v/v) DMSO. Three independent MD runs for each solvent are shown.

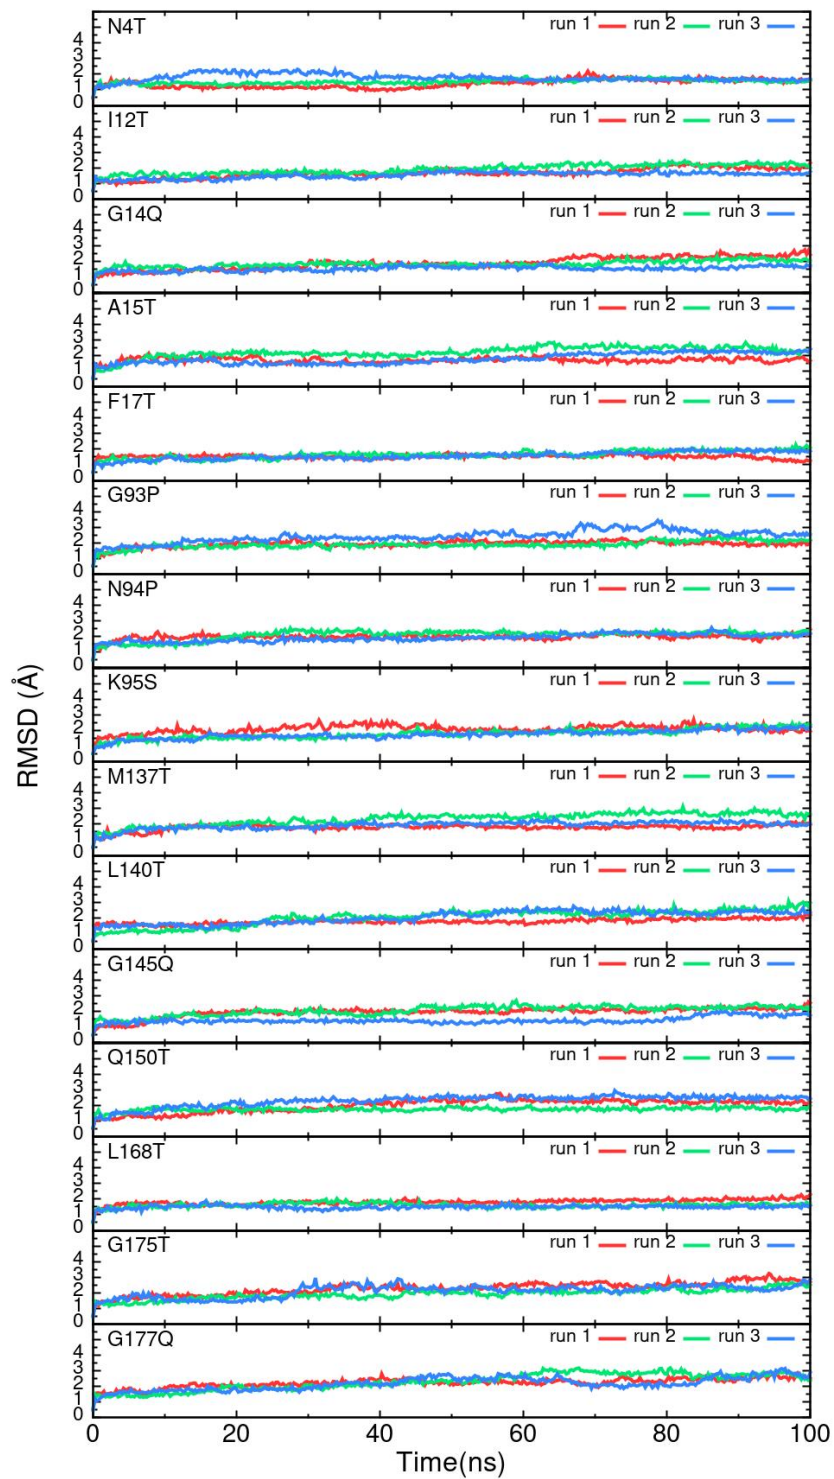

**Figure S2.** Root-mean-square deviation (RMSD) of the BSLA beneficial substitutions (group 1) backbone with respect to the initial structure as a function of time in 60 % (v/v) DMSO. Three independent MD runs for each solvent are shown.



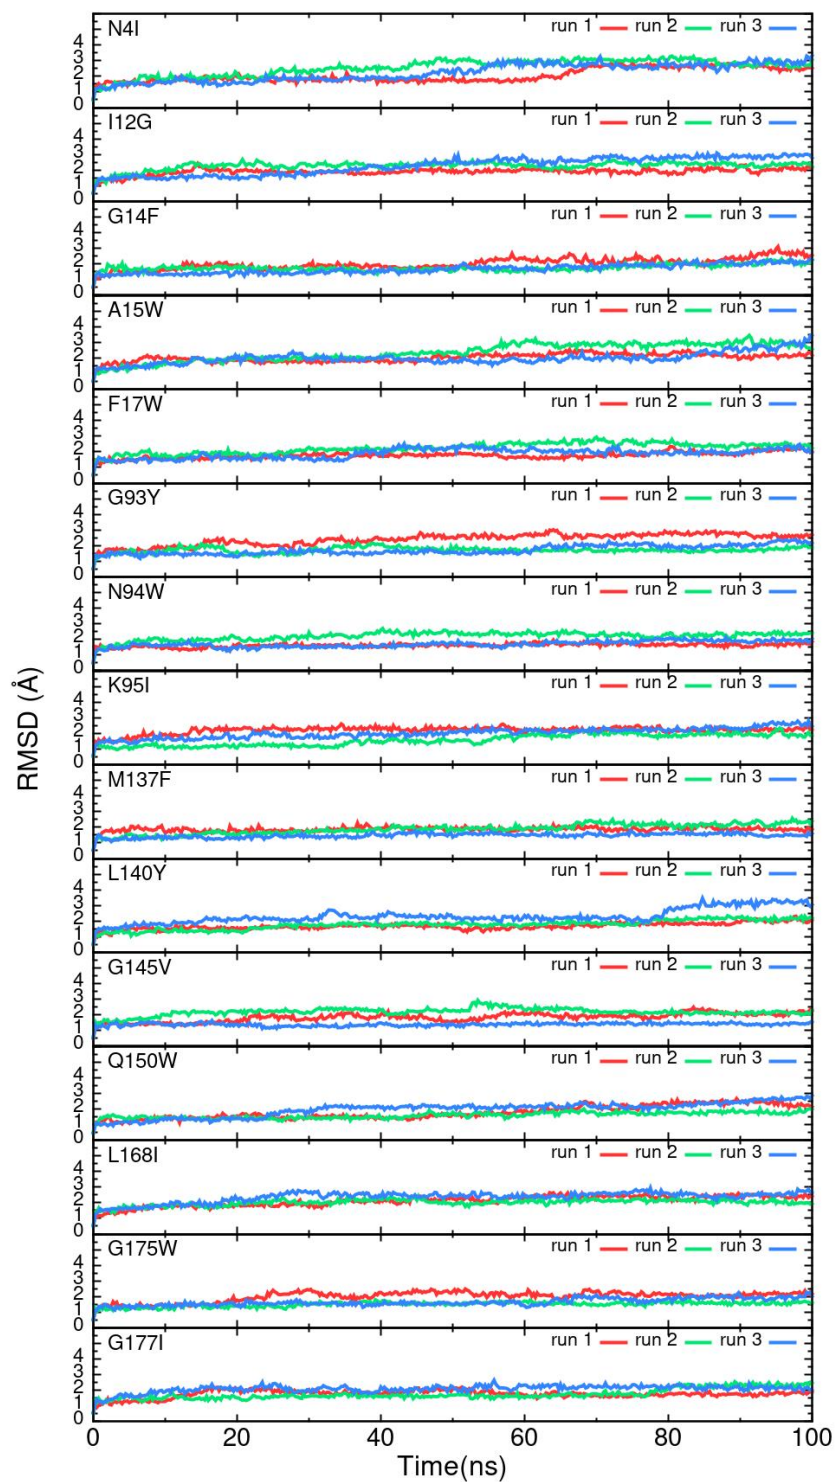

**Figure S3.** Root-mean-square deviation (RMSD) of the BSLA beneficial substitutions (group 2) backbone with respect to the initial structure as a function of time in 60 % (v/v) DMSO. Three independent MD runs for each solvent are shown.

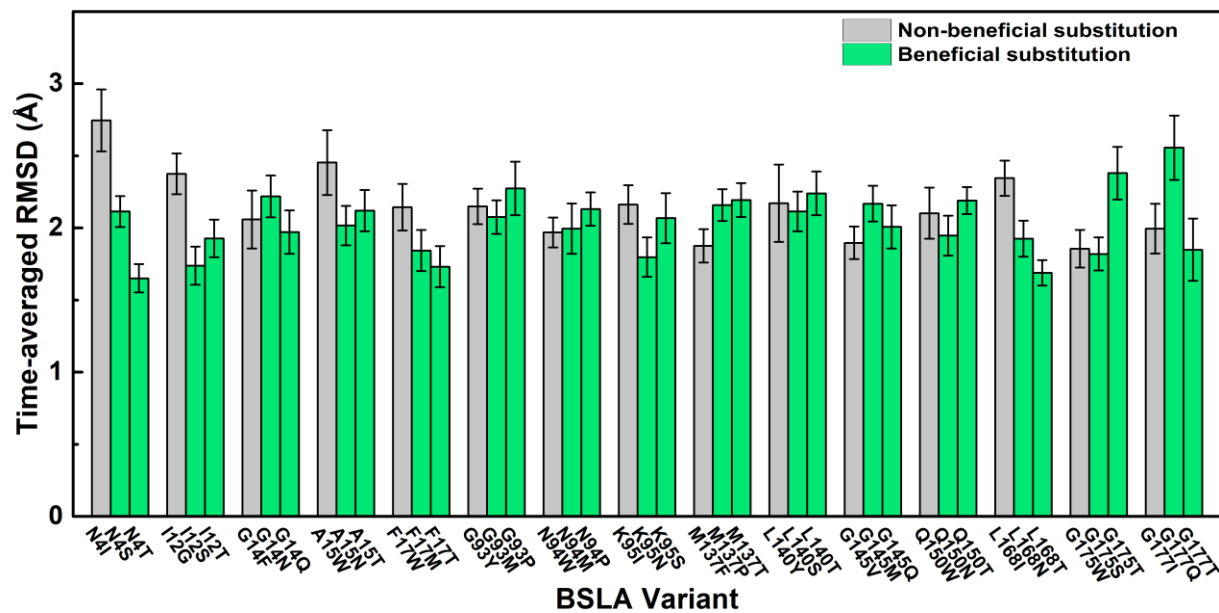

**Figure S4.** Time-average RMSD of BSLA non-beneficial and beneficial substitutions determined from the last 40 ns of simulations in 60 % (v/v) DMSO. Error bars describe the standard deviation from three independent MD runs.

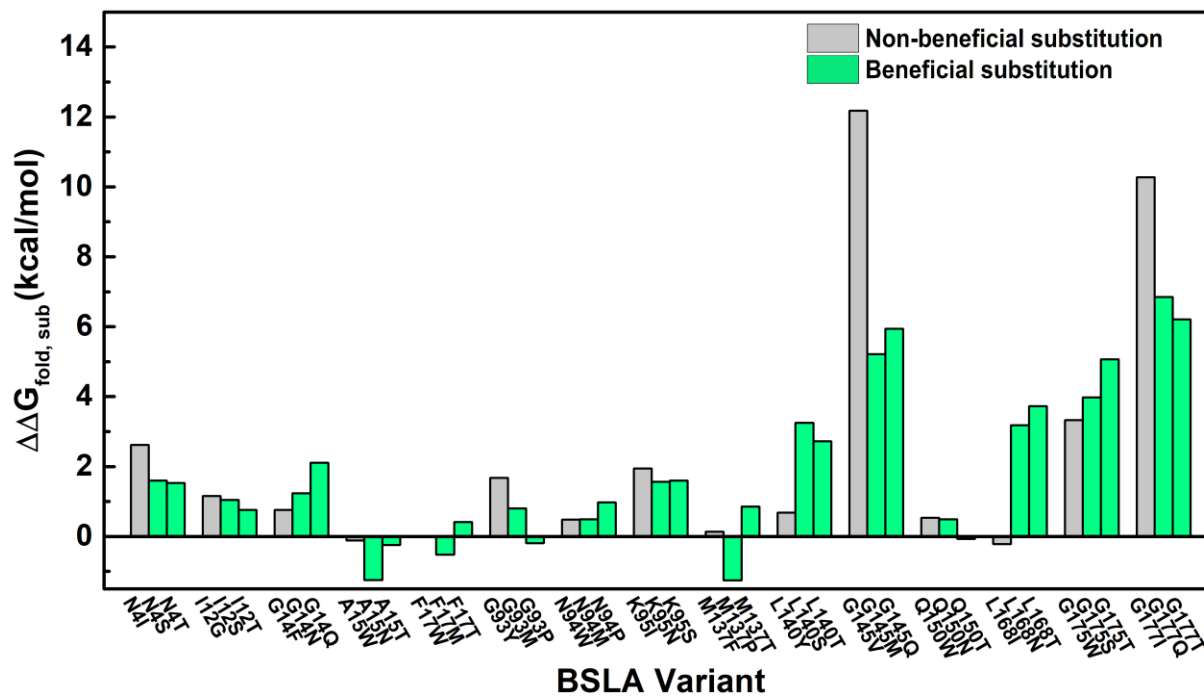

**Figure S5.** Thermodynamic stability ( $\Delta\Delta G_{\text{fold}}$ ) of BSLA beneficial and non-beneficial substitutions. The relative folding free energies ( $\Delta\Delta G_{\text{fold}} = \Delta G_{\text{fold,sub}} - \Delta G_{\text{fold,wt}}$ ) were computed using FoldX 4<sup>[7]</sup> employing YASARA Plugin<sup>[8]</sup> in YASARA Structure version 17.4.17<sup>[9]</sup> as our previous reported.<sup>[10]</sup> The larger the  $\Delta\Delta G_{\text{fold}}$  negative values, the higher the stability.

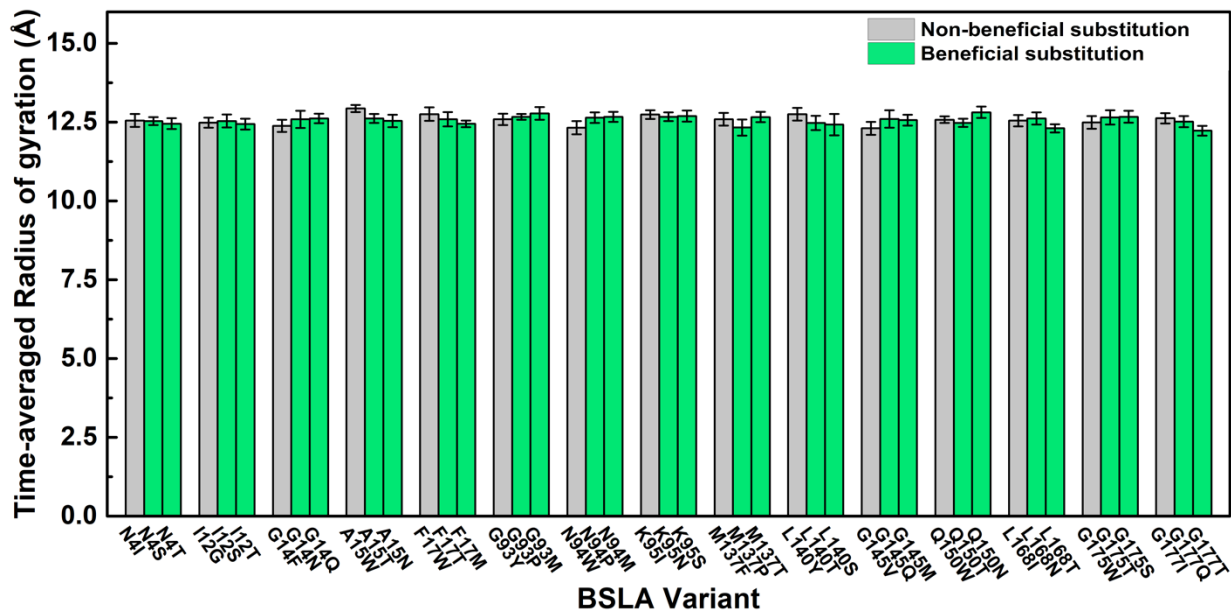

**Figure S6.** The time-averaged radius of gyration ( $R_g$ ) of BSLA non-beneficial and beneficial substitutions in 60 % (v/v) DMSO, the time-averaged  $R_g$  was calculated from the last 40 ns of the MD simulations. Error bars show the standard deviation from three independent MD runs.

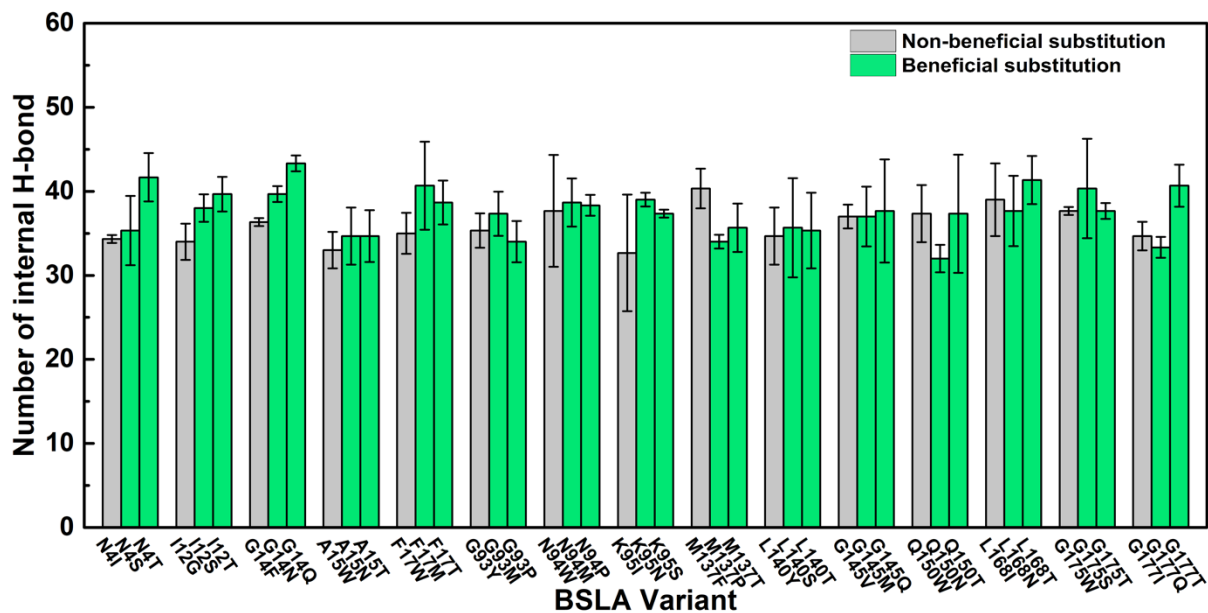

**Figure S7.** The number of internal hydrogen bonds with > 95% occupancy in BSLA beneficial and non-beneficial substitutions in 60 % (v/v) DMSO. All the data were calculated from the last 40 ns of the simulation. Error bars show the standard deviation from three independent MD runs. Geometric cut off for evaluation of hydrogen bond distance 3.5 Å and angle 30° were used.

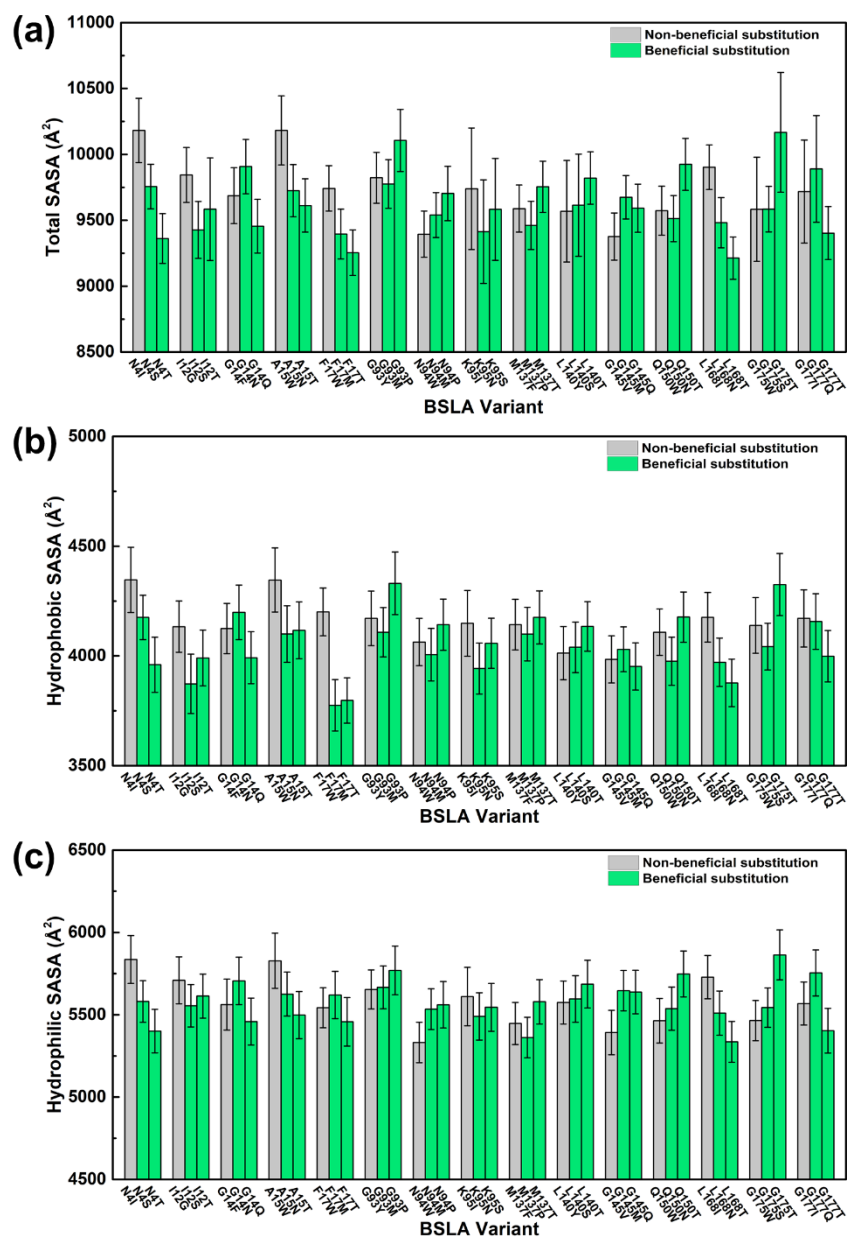

**Figure S8.** The time-averaged (a) total (b) hydrophobic (c) hydrophilic SASA of BSLA beneficial and non-beneficial substitutions in 60 % (v/v) DMSO. The average of SASA is computed based on the last 40 ns of each simulation. Error bars show the standard deviation from three independent MD runs for each variant. Here, SASA refers to the surface area of BSLA, which is accessible to water molecules and DMSO molecules calculated using a probe of radius 1.4  $\text{\AA}$ . The cut off -0.2 to 0.2 was used for hydrophobic and hydrophilic SASA calculations.<sup>[11]</sup>

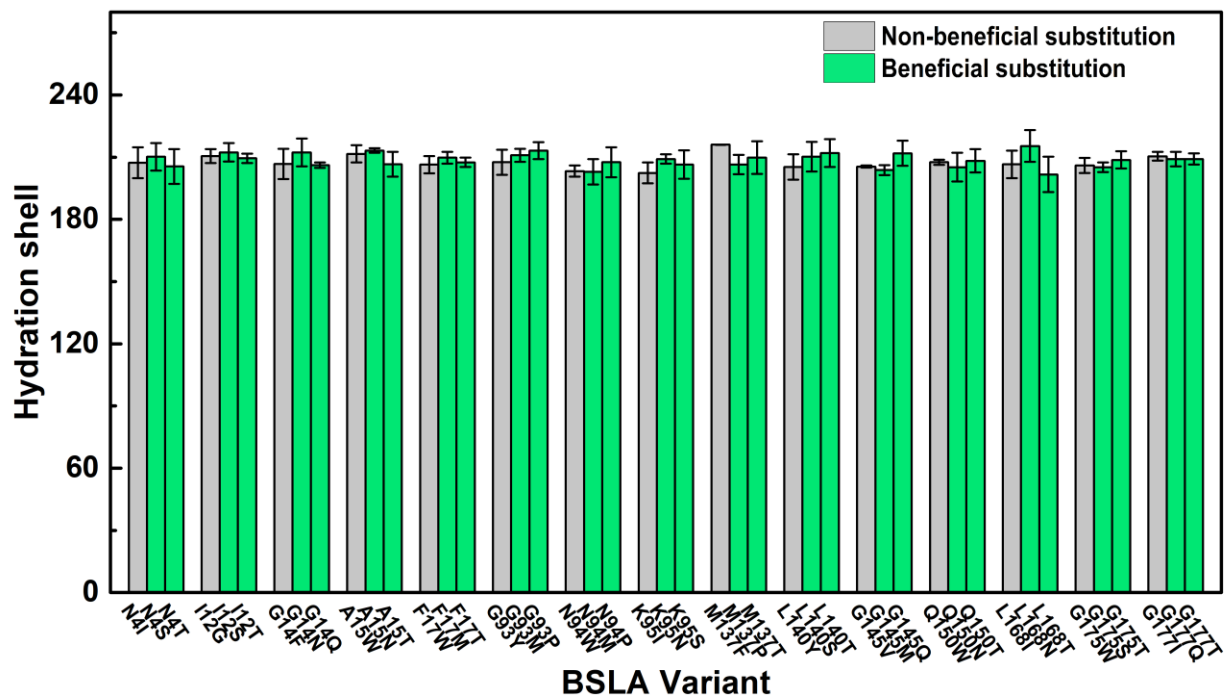

**Figure S9.** Hydration shell of BSLA beneficial and non-beneficial substitutions in 60 % (v/v) DMSO during MD simulations. Water molecules whose O atom is within 3.5 Å distance cut-off of any non-hydrogen atom of BSLA were described as the first hydration shell. The data of the hydration shell was averaged from three independent simulation runs.

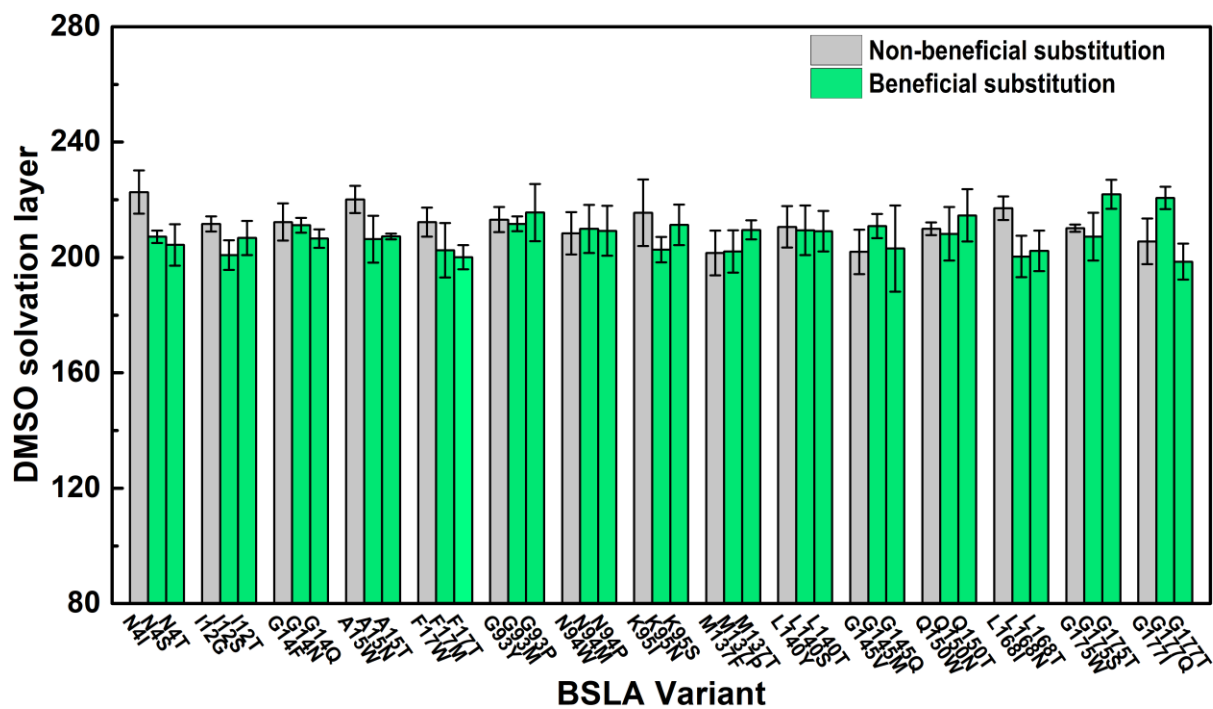

**Figure S10.** DMSO solvation layer of BSLA the non-beneficial and beneficial substitution in 60 % (v/v) DMSO during MD simulations. A similar definition with the hydrogen level is also defined for the organic solvent layer. A 6.8 Å cut-off was employed for DMSO as a previous study.<sup>[1]</sup> The data of the DMSO layer was averaged from three independent simulation runs



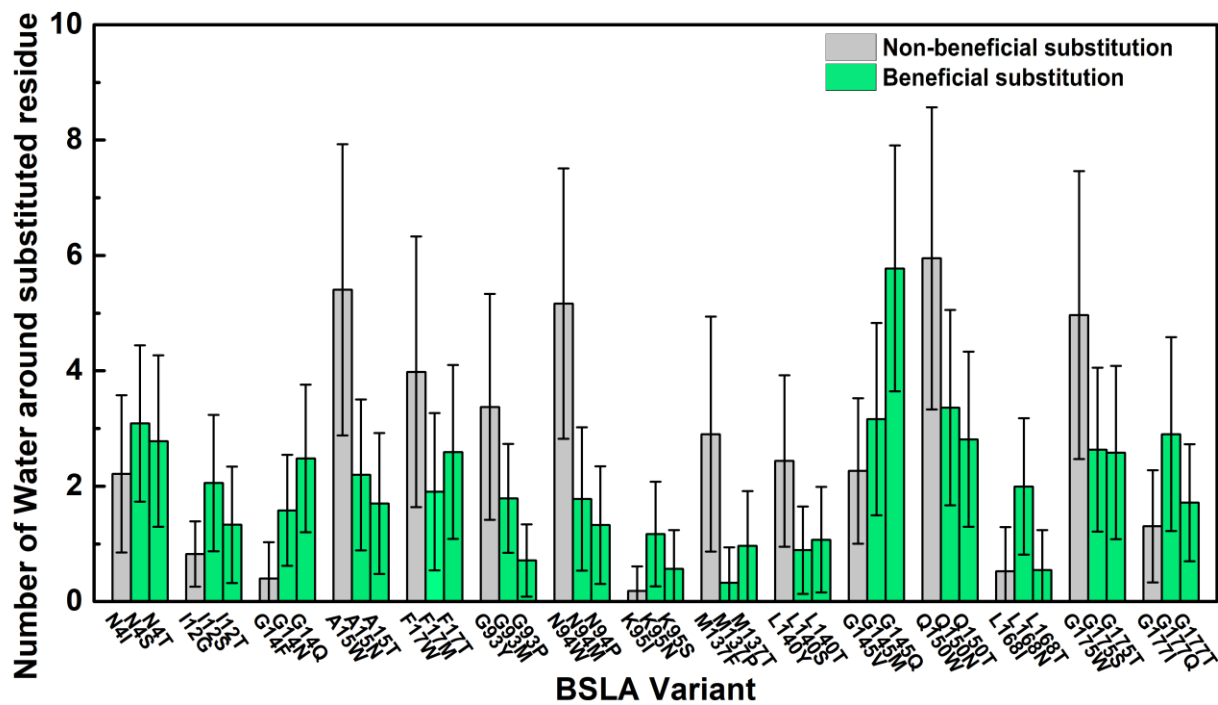

**Figure S11.** The average number of water molecules around the BSLA substituted residue during the MD simulations in 60 % (v/v) DMSO. The number of Water molecules was averaged over the last 40 ns from three independent MD runs.

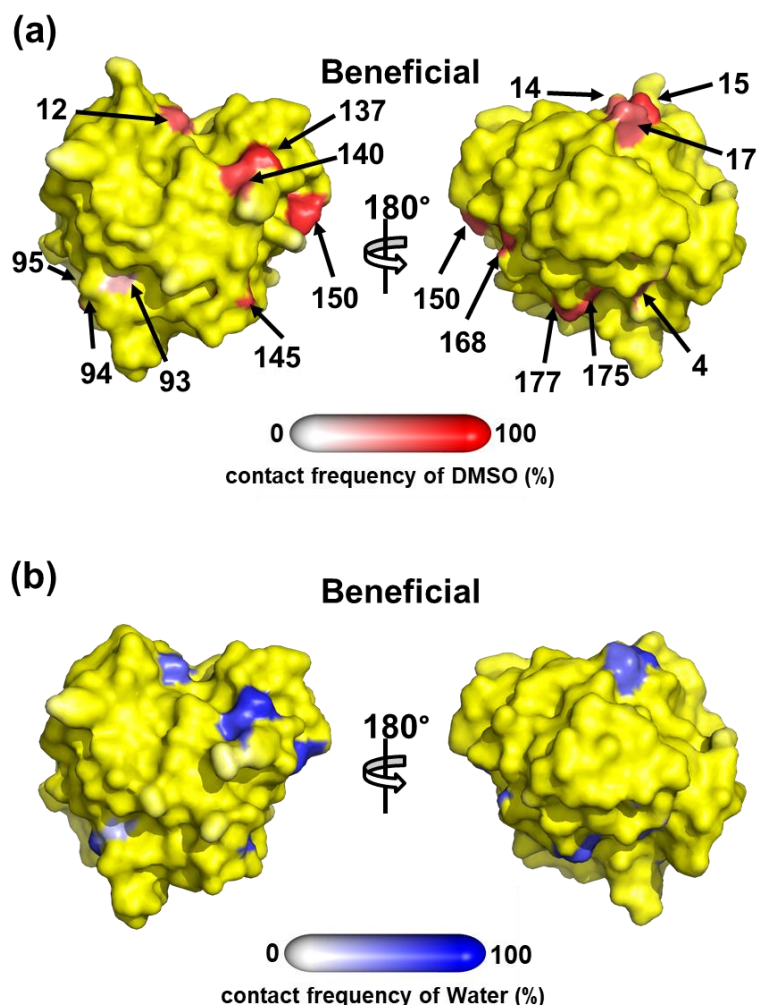

**Figure S12.** Contacts frequency of substituted sites between the BSLA beneficial substitution (group 2) and (a) water, (b) DMSO molecule in 60 % (v/v) DMSO, respectively. Residue-water/DMSO contact was defined as residue-water/DMSO molecule distance being  $2.5 \text{ \AA}$  or less.<sup>[1]</sup> Contact frequency was calculated over the last 40 ns from three independent MD runs. The ramp was colored from white to blue/red to indicate the change of residue-water/DMSO contact frequency from low to high. Specific substituted sites are labeled with amino acid position number. Except for the substituted sites, the rest surface is colored with yellow. Front-side (rotated by  $180^\circ$ ) views are shown to give a complete view of the BSLA substitutions. Each view of BSLA has the same orientation.

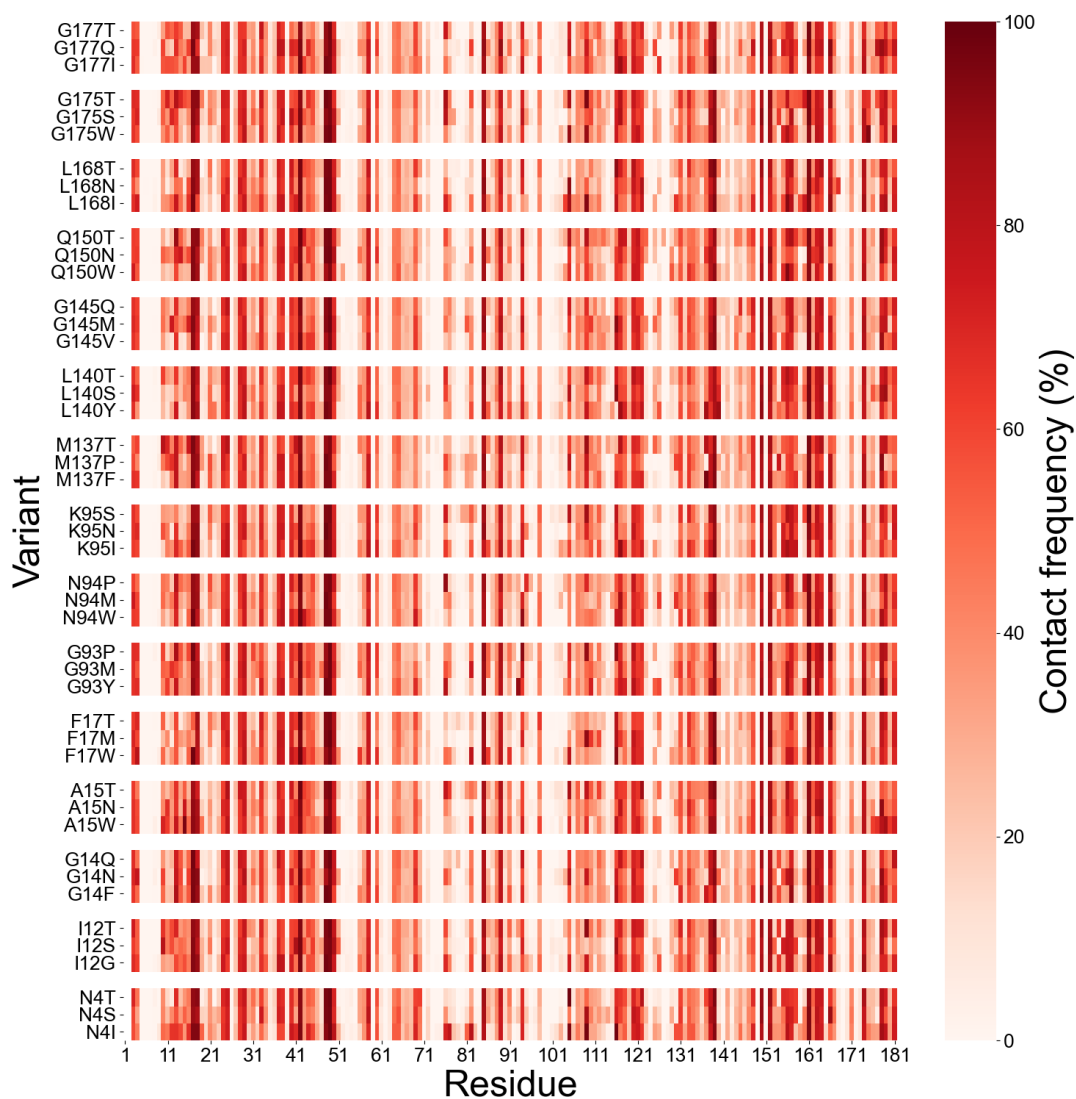

**Figure S13.** Contacts frequency between each BSLA residue and DMSO towards non-beneficial and beneficial substitutions in 60 % (v/v) DMSO. The cut-off 2.5 Å was applied to define the residue-DMSO contact.

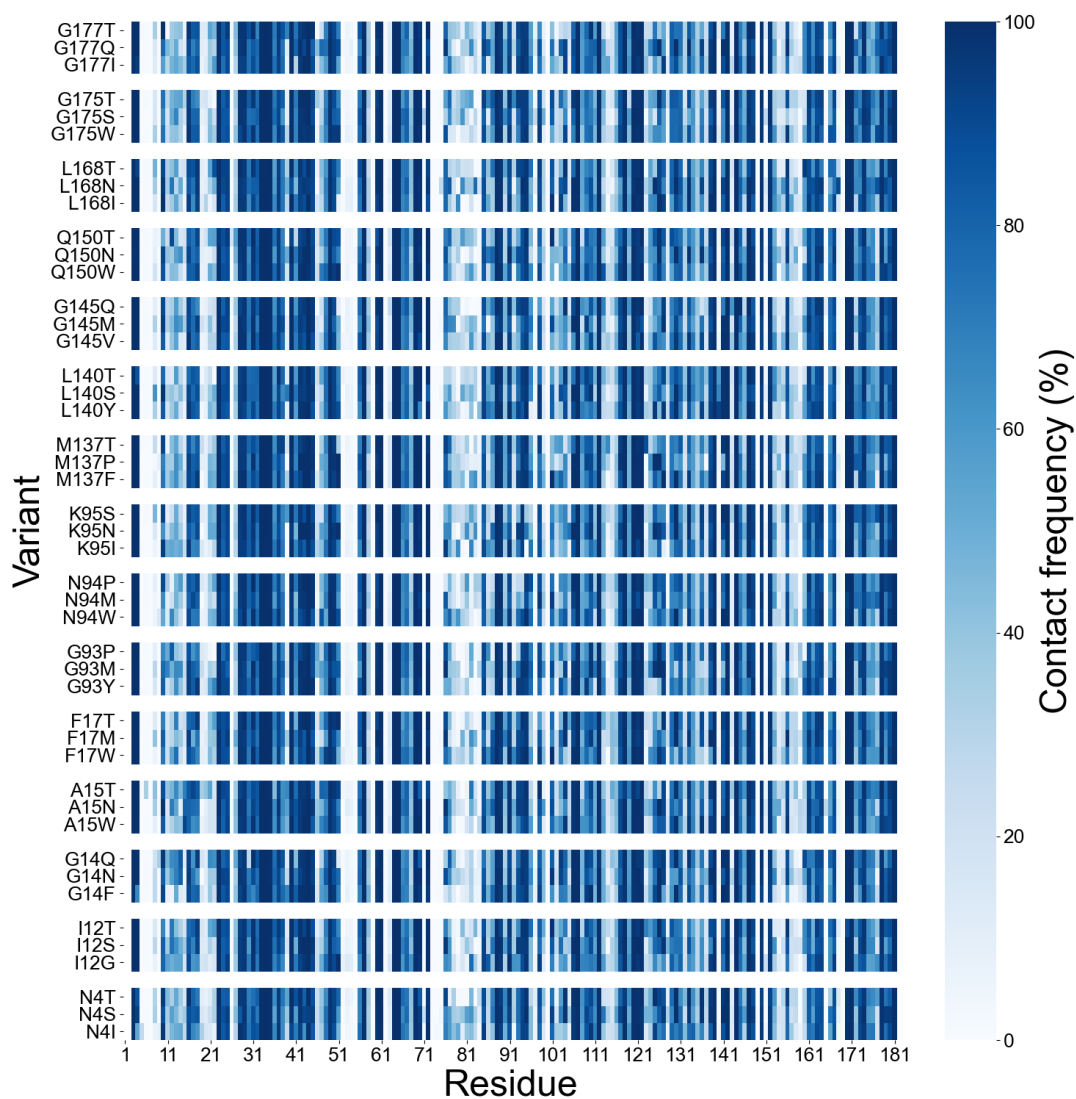

**Figure S14.** Contacts frequency between each BSLA residue and water towards non-beneficial and beneficial substitutions in 60 % (v/v) DMSO. The cut-off 2.5 Å was applied to define the residue-water contact.

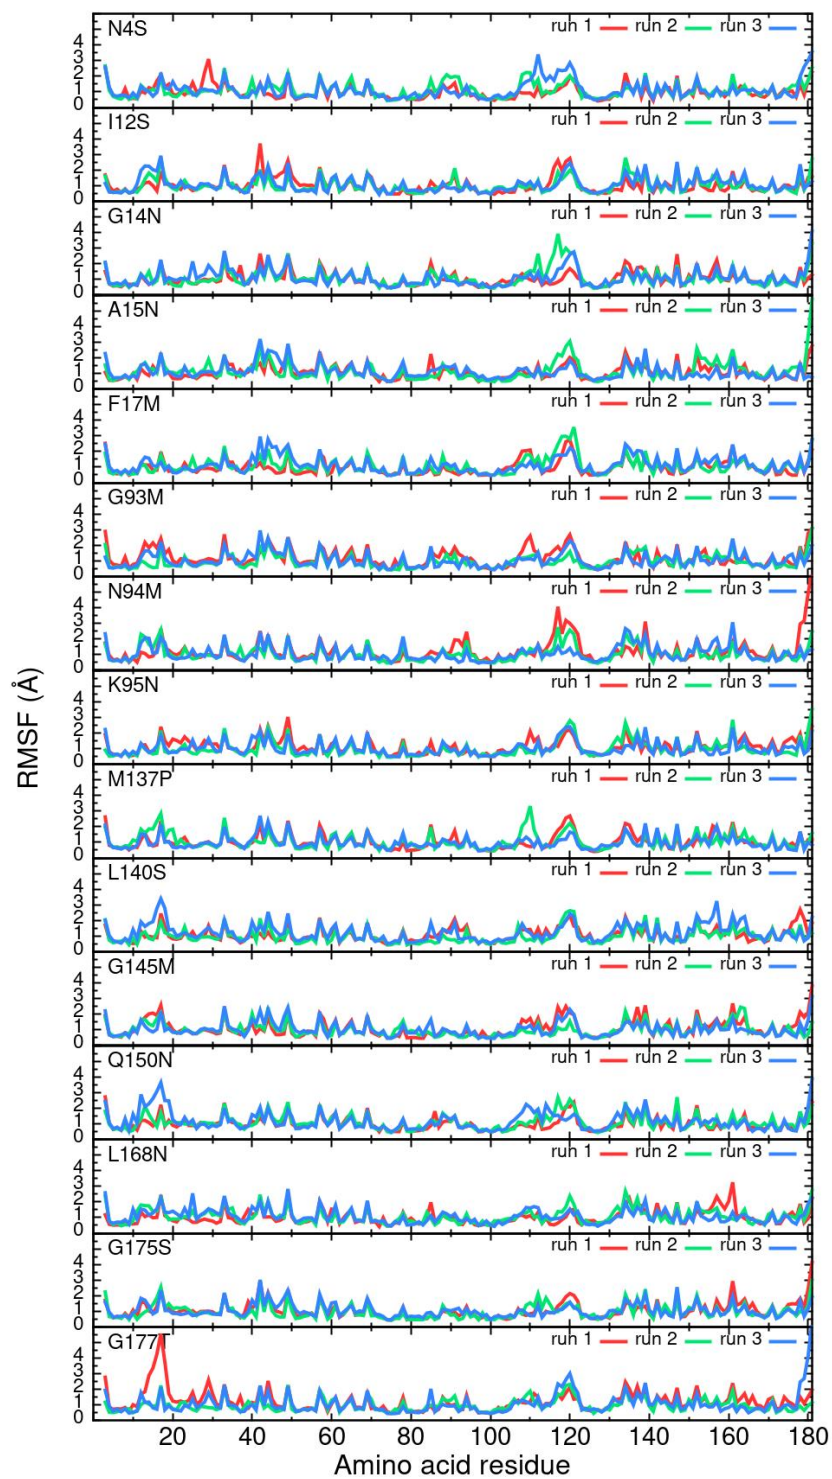

**Figure S15.** RMSF of each residue of BSLA non-beneficial substitutions determined from the last 40 ns of MD simulations in 60 % (v/v) DMSO. Three independent MD runs are shown.

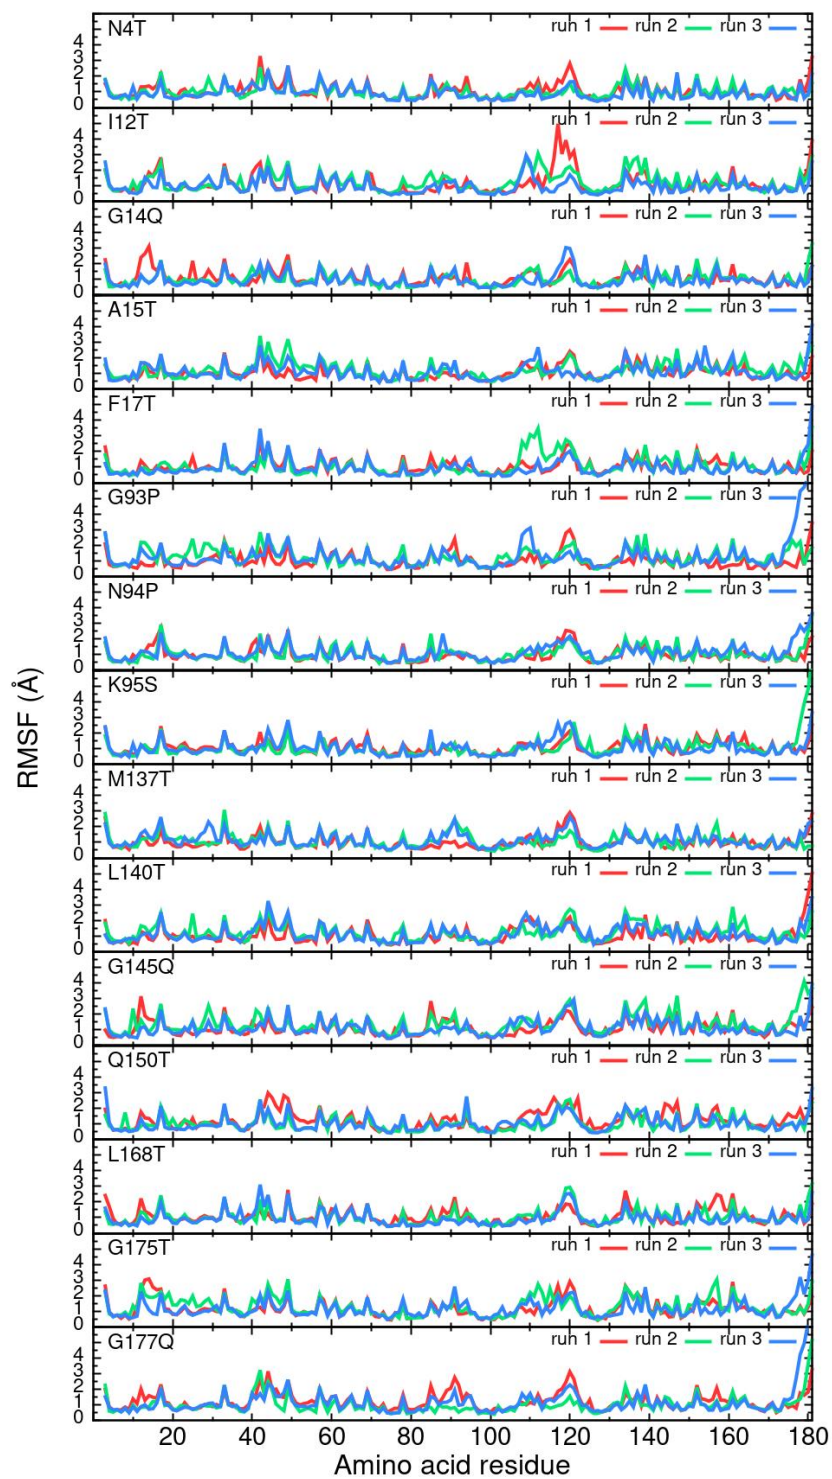

**Figure S16.** RMSF of each residue of BSLA beneficial substitutions (group 1) determined from the last 40 ns of MD simulations in 60 % (v/v) DMSO . Three independent MD runs are shown.

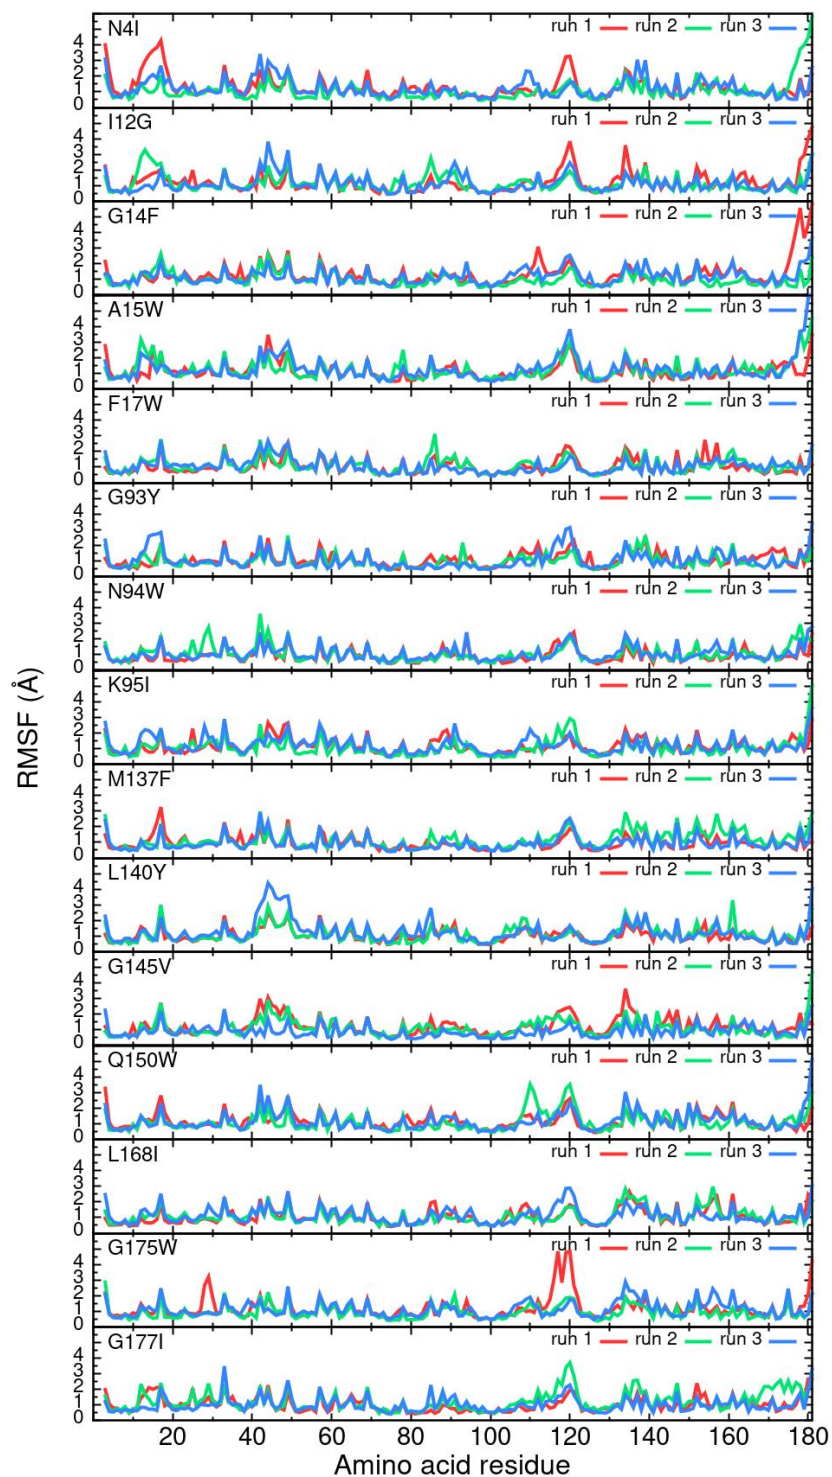

**Figure S17.** RMSF of each residue of BSLA beneficial substitutions (group 2) determined from the last 40 ns of MD simulations in 60 % (v/v) DMSO . Three independent MD runs are shown.

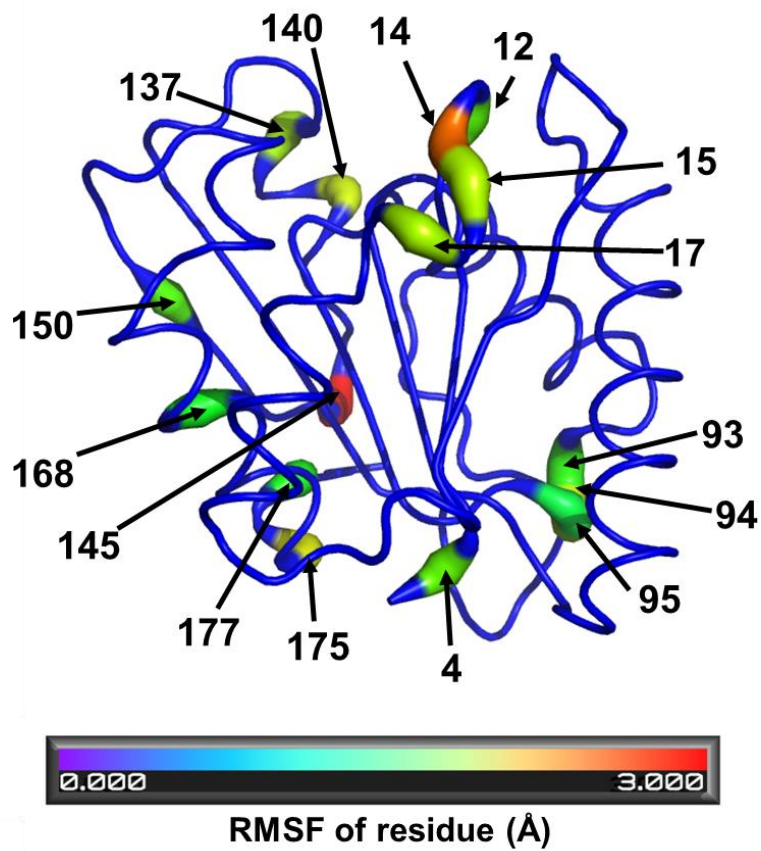

**Figure S18.** The RMSF of the substituted residue of BSLA beneficial substitutions (group 2) in 60 % (v/v) DMSO during MD simulations. The RMSF of substituted residue was averaged over the last 40 ns of three independent simulations.



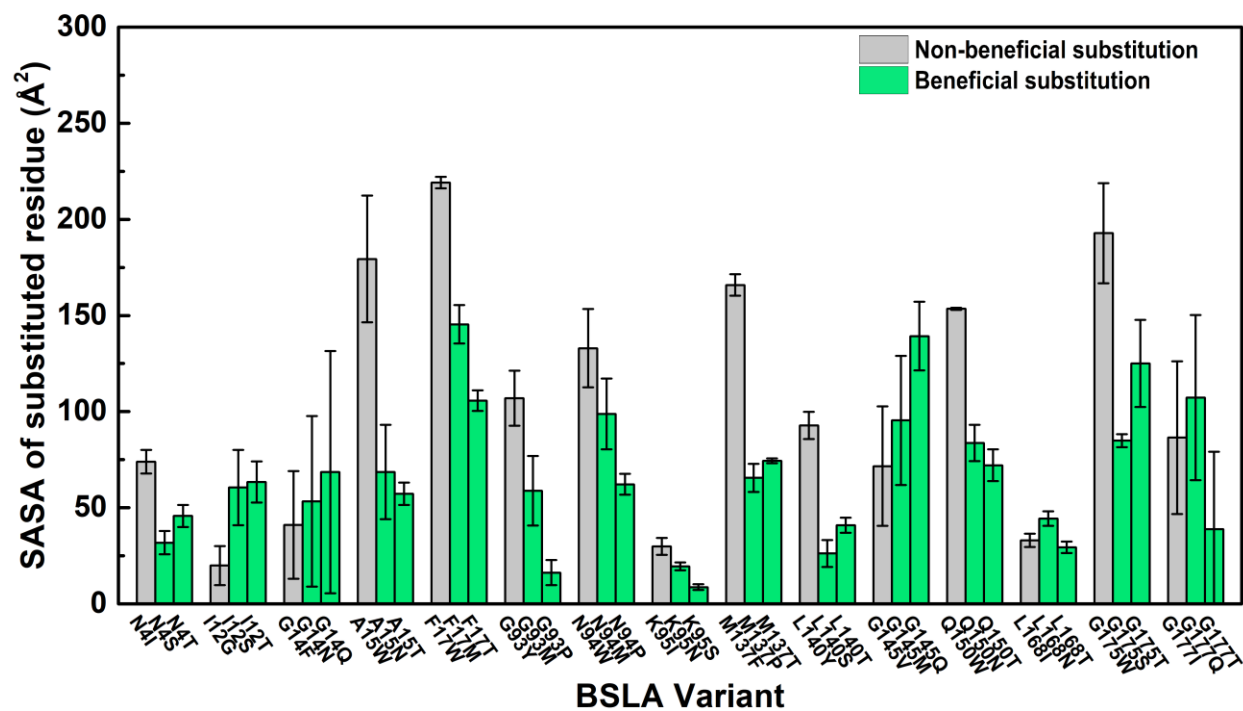

**Figure S19.** The SASA of the substituted residue of BSLA beneficial and non-beneficial substitutions in 60 % (v/v) DMSO during MD simulations. The SASA of substituted residue was averaged over the last 40 ns of three independent simulations.

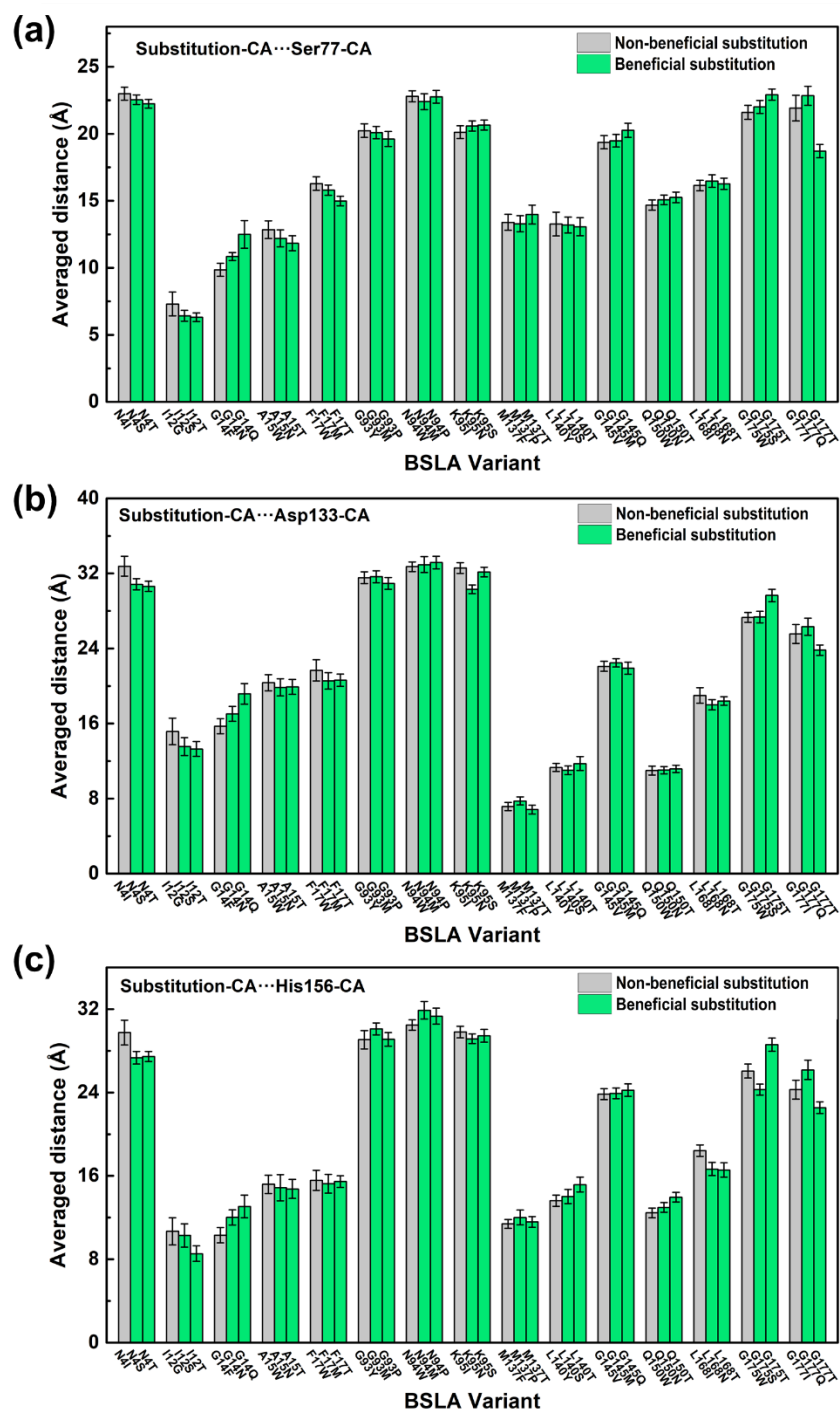

**Figure S20.** Averaged distance between substituted residue and the catalytic triad (a) Ser77, (b) Asp133, (c) His156 of BSLA beneficial and non-beneficial substitutions in 60 % (v/v) DMSO. The internal-atomic ( $C_{\alpha}$  atom) distance (Å) is defined as the distance between substituted residue and the catalytic triad and averaged over the last 40 ns of three independent simulations.

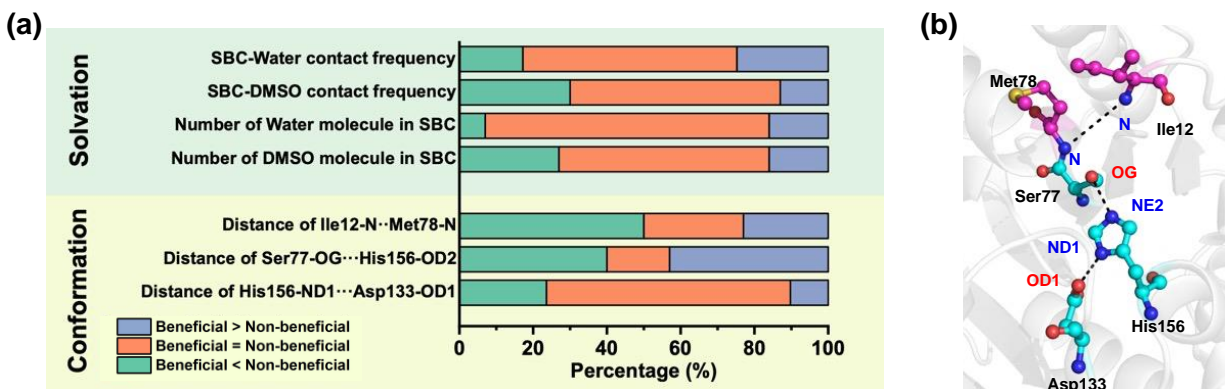

**Figure S21.** Conformational and solvation change in the substrate binding cleft. **(a)** The conformational change in the substrate binding cleft (SBC) described by calculating the averaged internal-atomic distance between the catalytic triad and oxyanion hole of BSLA variants. The DMSO/water solvation in SBC was calculated as previously reported, respectively. Representative structures of the catalytic triad and oxyanion hole were taken from BSLA WT (PDB ID: 1i6w,<sup>[3]</sup> Chain A). **(b)** The catalytic triad (Ser77, His156, Asp133) and oxyanion hole (Ile12, Met78) are shown as ball-and-stick with carbon (cyan/purple), oxygen (red), and nitrogen (blue). The black dashed line indicates the distance between two atoms.



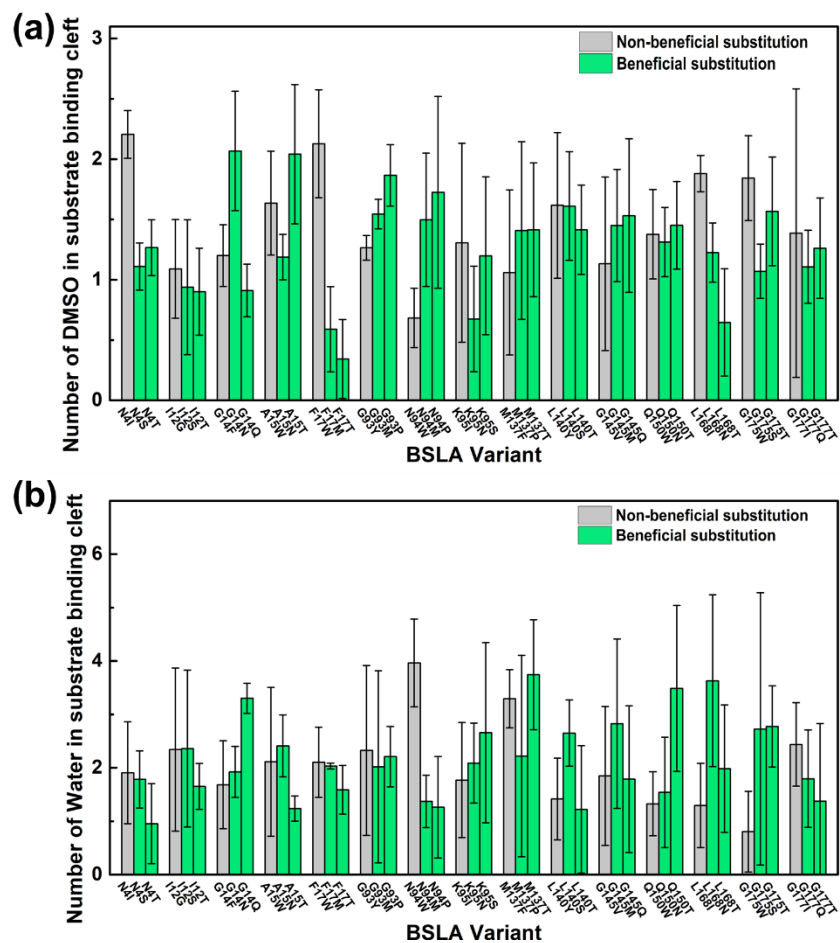

**Figure S23.** The average number of solvent molecules in substrate binding cleft of BSLA beneficial and non-beneficial substitutions during the MD simulations: **(a)** DMSO, and **(b)** Water. The number of DMSO/Water molecules was averaged over the last 40 ns from three independent MD runs.

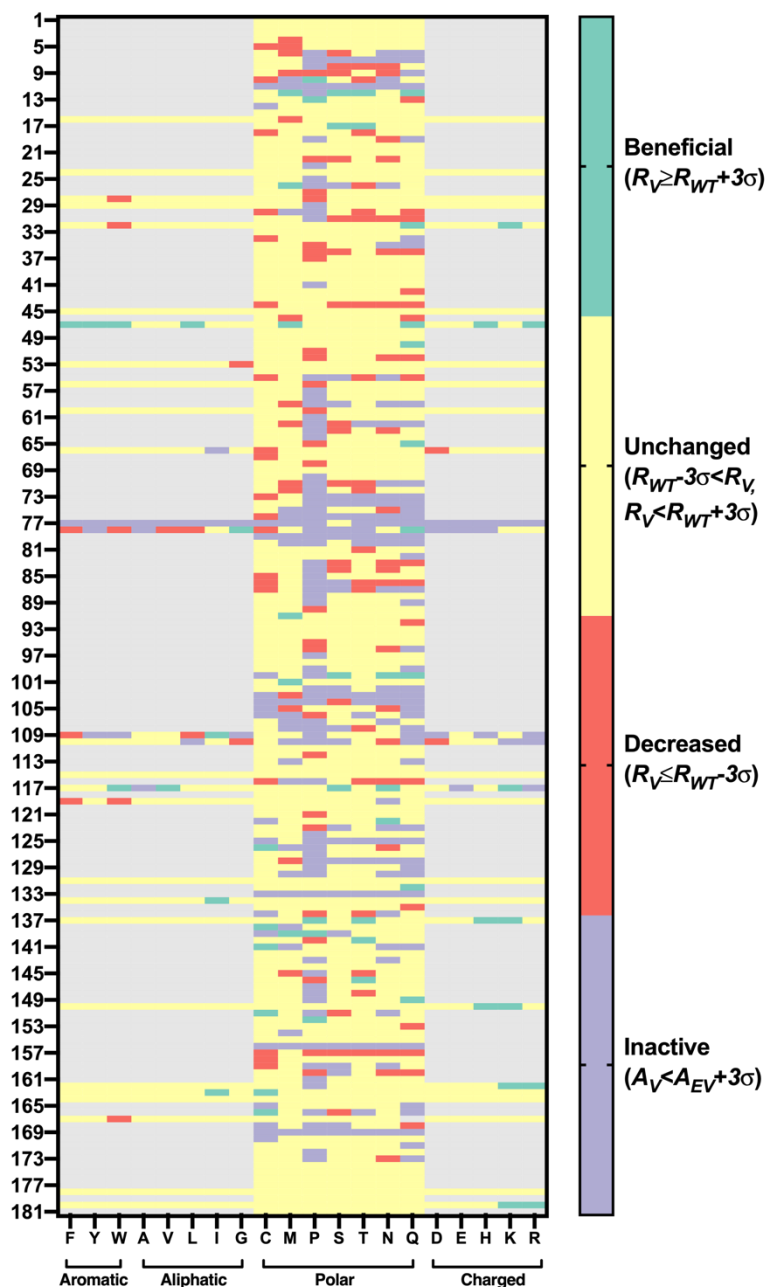

**Figure S24.** DOX resistance heatmap of BSLA surface polar-related substitutions. Residual activity, activity, variants, and the empty vector are denoted as R, A, V, and EV, respectively. The OS resistance was measured in the absence or presence of 22% (v/v) DOX cosolvents after 2 h incubation with crude culture supernatant. Amino acid is classified as follows: Aromatic: F, Y, W; Aliphatic: A, V, L, I, G; Polar: C, M, P, S, T, N, Q; Charged: D, E, K, H, R.

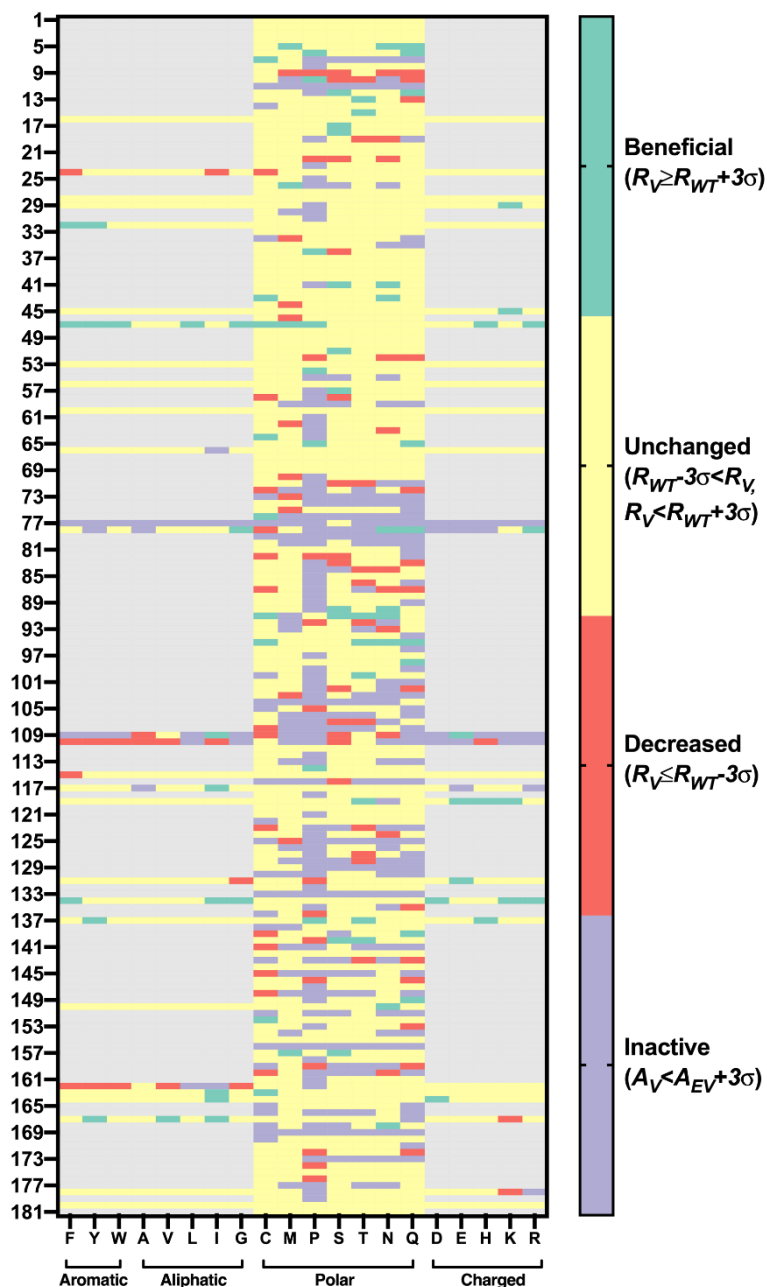

**Figure S25.** TFE resistance heatmap of BSLA surface polar-related substitutions. Residual activity, activity, variants, and the empty vector are denoted as R, A, V, and EV, respectively. The OS resistance was measured in the absence or presence of 12% (v/v) TFE cosolvents after 2 h incubation with crude culture supernatant. Amino acid is classified as follows: Aromatic: F, Y, W; Aliphatic: A, V, L, I, G; Polar: C, M, P, S, T, N, Q; Charged: D, E, K, H, R.

## Reference

- [1] H. Cui, T. H. J. Stadtmüller, Q. Jiang, K. E. Jaeger, U. Schwaneberg, M. D. Davari, *ChemCatChem* **2020**, *12*, 4073.
- [2] H. Cui, L. Zhang, L. Eltoukhy, Q. Jiang, S. K. Korkunç, K.-E. Jaeger, U. Schwaneberg, M. D. Davari, *ACS Catal.* **2020**, *10*, 14847-14856.
- [3] G. van Pouderooyen, T. Eggert, K. E. Jaeger, B. W. Dijkstra, *J. Mol. Biol.* **2001**, *309*, 215-226.
- [4] V. J. Frauenkron-Machedjou, A. Fulton, J. Zhao, L. Weber, K.-E. Jaeger, U. Schwaneberg, L. Zhu, *Bioresour. Bioprocess.* **2018**, *5*, 2.
- [5] W. Kabsch, C. Sander, *Biopolymers* **1983**, *22*, 2577-2637.
- [6] J. Zhao, N. Jia, K. E. Jaeger, M. Bocola, U. Schwaneberg, *Biotechnol. Bioeng.* **2015**, *112*, 1997-2004.
- [7] R. Guerois, J. E. Nielsen, L. Serrano, *J. Mol. Biol.* **2002**, *320*, 369-387.
- [8] J. Van Durme, J. Delgado, F. Stricher, L. Serrano, J. Schymkowitz, F. Rousseau, *Bioinformatics* **2011**, *27*, 1711-1712.
- [9] E. Krieger, G. Koraimann, G. Vriend, *Proteins: Struct., Funct., Bioinf.* **2002**, *47*, 393-402.
- [10] H. Cui, H. Cao, H. Cai, K. E. Jaeger, M. D. Davari, U. Schwaneberg, *Chem. Eur. J* **2020**, *26*, 643-649.
- [11] F. Eisenhaber, P. Lijnzaad, P. Argos, C. Sander, M. Scharf, *J. Comput. Chem.* **1995**, *16*, 273-284.
